# Supplementary material
Source: ML conference proceedings conference paper supplement (https://openreview.net/forum?id=HYWMtDLo5g5)
Supplement: supplementary_material [file attachment]

**a**

$$\varphi \stackrel{\text{def}}{=} \top, \chi \stackrel{\text{def}}{=} [x_1 \in [0, 2]] \wedge [x_2 \in [0, 3]]$$

**b** $w(\mathbf{x}, \mathbf{A})$ 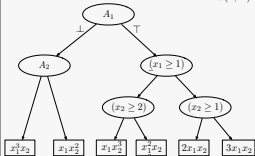**c**

$$\varphi^*(\mathbf{x}, \mathbf{A} \cup \mathbf{B}) \stackrel{\text{def}}{=} \varphi \wedge \chi \wedge B_1 \leftrightarrow (x_1 \geq 1) \wedge \\ B_2 \leftrightarrow (x_2 \geq 1) \wedge B_3 \leftrightarrow (x_2 \geq 2)$$

**d** $w^*(\mathbf{x}, \mathbf{A} \cup \mathbf{B})$ 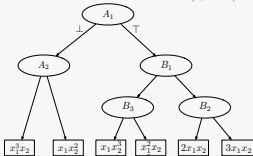**e**

| Assignment                                                                                  | Range                                                | w                                          |
|---------------------------------------------------------------------------------------------|------------------------------------------------------|--------------------------------------------|
| { A <sub>1</sub> , A <sub>2</sub> , B <sub>1</sub> , B <sub>2</sub> , B <sub>3</sub> }      | [x <sub>1</sub> ∈ [1, 2]], [x <sub>2</sub> ∈ [2, 3]] | x <sub>1</sub> <sup>3</sup> x <sub>2</sub> |
| { A <sub>1</sub> , A <sub>2</sub> , B <sub>1</sub> , B <sub>2</sub> , ¬B <sub>3</sub> }     | [x <sub>1</sub> ∈ [1, 2]], [x <sub>2</sub> ∈ [1, 2]] | x <sub>1</sub> <sup>3</sup> x <sub>2</sub> |
| { A <sub>1</sub> , A <sub>2</sub> , B <sub>1</sub> , ¬B <sub>2</sub> , ¬B <sub>3</sub> }    | [x <sub>1</sub> ∈ [1, 2]], [x <sub>2</sub> ∈ [0, 1]] | x <sub>1</sub> <sup>3</sup> x <sub>2</sub> |
| { A <sub>1</sub> , A <sub>2</sub> , ¬B <sub>1</sub> , B <sub>2</sub> , B <sub>3</sub> }     | [x <sub>1</sub> ∈ [0, 1]], [x <sub>2</sub> ∈ [2, 3]] | x <sub>1</sub> x <sub>2</sub> <sup>2</sup> |
| { A <sub>1</sub> , A <sub>2</sub> , ¬B <sub>1</sub> , B <sub>2</sub> , ¬B <sub>3</sub> }    | [x <sub>1</sub> ∈ [0, 1]], [x <sub>2</sub> ∈ [1, 2]] | x <sub>1</sub> x <sub>2</sub> <sup>2</sup> |
| { A <sub>1</sub> , A <sub>2</sub> , ¬B <sub>1</sub> , ¬B <sub>2</sub> , ¬B <sub>3</sub> }   | [x <sub>1</sub> ∈ [0, 1]], [x <sub>2</sub> ∈ [0, 1]] | x <sub>1</sub> x <sub>2</sub> <sup>2</sup> |
| { A <sub>1</sub> , ¬A <sub>2</sub> , B <sub>1</sub> , B <sub>2</sub> , B <sub>3</sub> }     | [x <sub>1</sub> ∈ [1, 2]], [x <sub>2</sub> ∈ [2, 3]] | x <sub>1</sub> <sup>2</sup> x <sub>2</sub> |
| ⋮ [same as with {A <sub>1</sub> , A <sub>2</sub> }]                                         | ⋮                                                    | ⋮                                          |
| { A <sub>1</sub> , ¬A <sub>2</sub> , ¬B <sub>1</sub> , ¬B <sub>2</sub> , ¬B <sub>3</sub> }  | [x <sub>1</sub> ∈ [0, 1]], [x <sub>2</sub> ∈ [0, 1]] | x <sub>1</sub> x <sub>2</sub> <sup>3</sup> |
| { ¬A <sub>1</sub> , A <sub>2</sub> , B <sub>1</sub> , B <sub>2</sub> , B <sub>3</sub> }     | [x <sub>1</sub> ∈ [1, 2]], [x <sub>2</sub> ∈ [2, 3]] | 2x <sub>1</sub> x <sub>2</sub>             |
| { ¬A <sub>1</sub> , A <sub>2</sub> , B <sub>1</sub> , B <sub>2</sub> , ¬B <sub>3</sub> }    | [x <sub>1</sub> ∈ [1, 2]], [x <sub>2</sub> ∈ [1, 2]] | 2x <sub>1</sub> x <sub>2</sub>             |
| { ¬A <sub>1</sub> , A <sub>2</sub> , B <sub>1</sub> , ¬B <sub>2</sub> , ¬B <sub>3</sub> }   | [x <sub>1</sub> ∈ [1, 2]], [x <sub>2</sub> ∈ [0, 1]] | 2x <sub>1</sub> x <sub>2</sub>             |
| { ¬A <sub>1</sub> , A <sub>2</sub> , ¬B <sub>1</sub> , B <sub>2</sub> , B <sub>3</sub> }    | [x <sub>1</sub> ∈ [0, 1]], [x <sub>2</sub> ∈ [2, 3]] | 2x <sub>1</sub> x <sub>2</sub>             |
| { ¬A <sub>1</sub> , A <sub>2</sub> , ¬B <sub>1</sub> , B <sub>2</sub> , ¬B <sub>3</sub> }   | [x <sub>1</sub> ∈ [0, 1]], [x <sub>2</sub> ∈ [1, 2]] | 2x <sub>1</sub> x <sub>2</sub>             |
| { ¬A <sub>1</sub> , A <sub>2</sub> , ¬B <sub>1</sub> , ¬B <sub>2</sub> , ¬B <sub>3</sub> }  | [x <sub>1</sub> ∈ [0, 1]], [x <sub>2</sub> ∈ [0, 1]] | 2x <sub>1</sub> x <sub>2</sub>             |
| { ¬A <sub>1</sub> , ¬A <sub>2</sub> , B <sub>1</sub> , B <sub>2</sub> , B <sub>3</sub> }    | [x <sub>1</sub> ∈ [1, 2]], [x <sub>2</sub> ∈ [2, 3]] | 3x <sub>1</sub> x <sub>2</sub>             |
| ⋮ [same as with {¬A <sub>1</sub> , A <sub>2</sub> }]                                        | ⋮                                                    | ⋮                                          |
| { ¬A <sub>1</sub> , ¬A <sub>2</sub> , ¬B <sub>1</sub> , ¬B <sub>2</sub> , ¬B <sub>3</sub> } | [x <sub>1</sub> ∈ [0, 1]], [x <sub>2</sub> ∈ [0, 1]] | 3x <sub>1</sub> x <sub>2</sub>             |
