# Supplementary material
Source: ML conference proceedings conference paper supplement (https://openreview.net/forum?id=HYWMtDLo5g5)
Supplement: supplementary_material [file attachment]

a

 $w(\mathbf{x}, \mathbf{A})$ 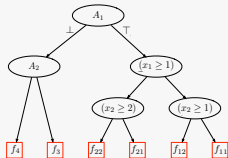

c

$$\begin{aligned}
 &(\neg A_1 \vee (x_1 \geq 1) \vee \neg(x_2 \geq 2) \vee (y_2 = f_{21})) \\
 &\wedge (\neg A_1 \vee (x_1 \geq 1) \vee (x_2 \geq 2) \vee (y_2 = f_{22})) \\
 &\wedge (\neg A_1 \vee (x_1 \geq 1) \vee \neg(y_2 = f_{21}) \vee \neg(y_2 = f_{22}))
 \end{aligned}$$

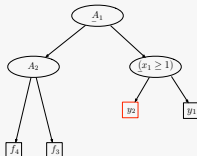

e

$$\begin{aligned}
 &(A_1 \vee \neg A_2 \vee (y_4 = f_3)) \\
 &\wedge (A_1 \vee A_2 \vee (y_4 = f_4)) \\
 &\wedge (A_1 \vee \neg(y_4 = f_3) \vee \neg(y_4 = f_4))
 \end{aligned}$$

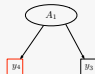

b

$$\begin{aligned}
 &(\neg A_1 \vee \neg(x_1 \geq 1) \vee \neg(x_2 \geq 1) \vee (y_1 = f_{11})) \\
 &\wedge (\neg A_1 \vee \neg(x_1 \geq 1) \vee (x_2 \geq 1) \vee (y_1 = f_{12})) \\
 &\wedge (\neg A_1 \vee \neg(x_1 \geq 1) \vee \neg(y_1 = f_{11}) \vee \neg(y_1 = f_{12}))
 \end{aligned}$$

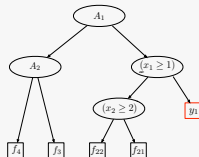

d

$$\begin{aligned}
 &(\neg A_1 \vee \neg(x_1 \geq 1) \vee (y_3 = y_1)) \\
 &\wedge (\neg A_1 \vee (x_1 \geq 1) \vee (y_3 = y_2)) \\
 &\wedge (\neg A_1 \vee \neg(y_3 = y_1) \vee \neg(y_3 = y_2))
 \end{aligned}$$

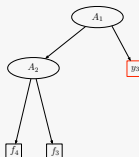

f

$$\begin{aligned}
 &(\neg A_1 \vee (y_5 = y_3)) \wedge (A_1 \vee (y_5 = y_4)) \\
 &\wedge (\neg(y_5 = y_3) \vee \neg(y_5 = y_4))
 \end{aligned}$$

y5 (in a red box)

g

$$(y = y_5)$$
