# Supplementary material
Source: ML conference proceedings conference paper supplement (https://openreview.net/forum?id=HYWMtDLo5g5)
Supplement: supplementary_material [file attachment]

**a**

$$\{(y = y_5), A_1, (y_5 = y_3), \neg(y_5 = y_4), (x_1 \geq 1), (y_3 = y_1), \\ \neg(y_3 = y_2), (x_2 \geq 1), ((y_1 = f_{11}), \neg(y_1 = f_{12}))\}$$

$$\begin{array}{ll} (\neg A_1 \vee \neg(x_1 \geq 1) \vee \neg(x_2 \geq 1) \vee (y_1 = f_{11})) & \wedge (A_1 \vee \neg A_2 \vee (y_4 = f_3)) \\ \wedge (\neg A_1 \vee \neg(x_1 \geq 1) \vee (x_2 \geq 1) \vee (y_1 = f_{12})) & \wedge (A_1 \vee A_2 \vee (y_4 = f_4)) \\ \wedge (\neg A_1 \vee \neg(x_1 \geq 1) \vee \neg(y_1 = f_{11}) \vee \neg(y_1 = f_{12})) & \wedge (A_1 \vee \neg(y_4 = f_3) \vee \neg(y_4 = f_4)) \\ \wedge (\neg A_1 \vee (x_1 \geq 1) \vee \neg(x_2 \geq 2) \vee (y_2 = f_{21})) & \wedge (\neg A_1 \vee (y_5 = y_3)) \\ \wedge (\neg A_1 \vee (x_1 \geq 1) \vee (x_2 \geq 2) \vee (y_2 = f_{22})) & \wedge (A_1 \vee (y_5 = y_4)) \\ \wedge (\neg A_1 \vee (x_1 \geq 1) \vee \neg(y_2 = f_{21}) \vee \neg(y_2 = f_{22})) & \wedge (\neg(y_5 = y_3) \vee \neg(y_5 = y_4)) \\ \wedge (\neg A_1 \vee \neg(x_1 \geq 1) \vee (y_3 = y_1)) & \wedge (y = y_5) \\ \wedge (\neg A_1 \vee (x_1 \geq 1) \vee (y_3 = y_2)) & \\ \wedge (\neg A_1 \vee \neg(y_3 = y_1) \vee \neg(y_3 = y_2)) & \end{array}$$

**b**

$$\{(y = y_5), A_1, (y_5 = y_3), \neg(y_5 = y_4), (x_1 \geq 1), (y_3 = y_1), \\ \neg(y_3 = y_2), \neg(x_2 \geq 1), (y_1 = f_{12}), \neg(y_1 = f_{11}))\}$$

$$\begin{array}{ll} (\neg A_1 \vee \neg(x_1 \geq 1) \vee \neg(x_2 \geq 1) \vee (y_1 = f_{11})) & \wedge (A_1 \vee \neg A_2 \vee (y_4 = f_3)) \\ \wedge (\neg A_1 \vee \neg(x_1 \geq 1) \vee (x_2 \geq 1) \vee (y_1 = f_{12})) & \wedge (A_1 \vee A_2 \vee (y_4 = f_4)) \\ \wedge (\neg A_1 \vee \neg(x_1 \geq 1) \vee \neg(y_1 = f_{11}) \vee \neg(y_1 = f_{12})) & \wedge (A_1 \vee \neg(y_4 = f_3) \vee \neg(y_4 = f_4)) \\ \wedge (\neg A_1 \vee (x_1 \geq 1) \vee \neg(x_2 \geq 2) \vee (y_2 = f_{21})) & \wedge (\neg A_1 \vee (y_5 = y_3)) \\ \wedge (\neg A_1 \vee (x_1 \geq 1) \vee (x_2 \geq 2) \vee (y_2 = f_{22})) & \wedge (A_1 \vee (y_5 = y_4)) \\ \wedge (\neg A_1 \vee (x_1 \geq 1) \vee \neg(y_2 = f_{21}) \vee \neg(y_2 = f_{22})) & \wedge (\neg(y_5 = y_3) \vee \neg(y_5 = y_4)) \\ \wedge (\neg A_1 \vee \neg(x_1 \geq 1) \vee (y_3 = y_1)) & \wedge (y = y_5) \\ \wedge (\neg A_1 \vee (x_1 \geq 1) \vee (y_3 = y_2)) & \wedge (\neg A_1 \vee \neg(x_1 \geq 1) \vee \neg(x_2 \geq 1)) \\ \wedge (\neg A_1 \vee \neg(y_3 = y_1) \vee \neg(y_3 = y_2)) & \end{array}$$

**c**

$$\mathcal{TA}(\exists xy. (\varphi \wedge \chi \wedge \llbracket y = w \rrbracket_{\mathcal{EF}}))$$

| Assignment                                              | Labeling                       |
|---------------------------------------------------------|--------------------------------|
| $\chi \cup \{A_1, (x_1 \geq 1), (x_2 \geq 1)\}$         | $y = y_5 = y_3 = y_1 = f_{11}$ |
| $\chi \cup \{A_1, (x_1 \geq 1), \neg(x_2 \geq 1)\}$     | $y = y_5 = y_3 = y_1 = f_{12}$ |
| $\chi \cup \{A_1, \neg(x_1 \geq 1), (x_2 \geq 2)\}$     | $y = y_5 = y_3 = y_2 = f_{21}$ |
| $\chi \cup \{A_1, \neg(x_1 \geq 1), \neg(x_2 \geq 2)\}$ | $y = y_5 = y_3 = y_2 = f_{22}$ |
| $\chi \cup \{\neg A_1, A_2\}$                           | $y = y_5 = y_4 = f_3$          |
| $\chi \cup \{\neg A_1, \neg A_2\}$                      | $y = y_5 = y_4 = f_4$          |
