# Supplementary material
Source: ML conference proceedings conference paper supplement (https://openreview.net/forum?id=HYWMtDLo5g5)
Supplement: supplementary_material [file attachment]

| <b>a</b> $\varphi \stackrel{\text{def}}{=} \top, \chi \stackrel{\text{def}}{=} \llbracket x_1 \in [0, 2] \rrbracket \wedge \llbracket x_2 \in [0, 3] \rrbracket$ | <b>c</b> $\varphi^*(\mathbf{x}, \mathbf{A} \cup \mathbf{B}) \stackrel{\text{def}}{=} \varphi \wedge \chi \wedge B_1 \leftrightarrow (x_1 \geq 1) \wedge \\ B_2 \leftrightarrow (x_2 \geq 1) \wedge B_3 \leftrightarrow (x_2 \geq 2)$ | <b>e</b> <table border="1"> <thead> <tr> <th>Assignment</th><th>Range</th><th><math>w</math></th></tr> </thead> <tbody> <tr> <td><math>\{A_1, A_2, B_1, B_2, B_3\}</math></td><td><math>\llbracket x_1 \in [1, 2] \rrbracket, \llbracket x_2 \in [2, 3] \rrbracket</math></td><td><math>f_{11}</math></td></tr> <tr> <td><math>\{A_1, A_2, B_1, B_2, \neg B_3\}</math></td><td><math>\llbracket x_1 \in [1, 2] \rrbracket, \llbracket x_2 \in [1, 2] \rrbracket</math></td><td><math>f_{11}</math></td></tr> <tr> <td><math>\{A_1, A_2, B_1, \neg B_2, \neg B_3\}</math></td><td><math>\llbracket x_1 \in [1, 2] \rrbracket, \llbracket x_2 \in [0, 1] \rrbracket</math></td><td><math>f_{12}</math></td></tr> <tr> <td><math>\{A_1, A_2, \neg B_1, B_2, B_3\}</math></td><td><math>\llbracket x_1 \in [0, 1] \rrbracket, \llbracket x_2 \in [2, 3] \rrbracket</math></td><td><math>f_{21}</math></td></tr> <tr> <td><math>\{A_1, A_2, \neg B_1, B_2, \neg B_3\}</math></td><td><math>\llbracket x_1 \in [0, 1] \rrbracket, \llbracket x_2 \in [1, 2] \rrbracket</math></td><td><math>f_{22}</math></td></tr> <tr> <td><math>\{A_1, A_2, \neg B_1, \neg B_2, \neg B_3\}</math></td><td><math>\llbracket x_1 \in [0, 1] \rrbracket, \llbracket x_2 \in [0, 1] \rrbracket</math></td><td><math>f_{22}</math></td></tr> <tr> <td><math>\{A_1, \neg A_2, B_1, B_2, B_3\}</math></td><td><math>\llbracket x_1 \in [1, 2] \rrbracket, \llbracket x_2 \in [2, 3] \rrbracket</math></td><td><math>f_{11}</math></td></tr> <tr> <td><math>\vdots [\text{same as with } \{A_1, A_2\}]</math></td><td><math>\vdots</math></td><td><math>\vdots</math></td></tr> <tr> <td><math>\{A_1, \neg A_2, \neg B_1, \neg B_2, \neg B_3\}</math></td><td><math>\llbracket x_1 \in [0, 1] \rrbracket, \llbracket x_2 \in [0, 1] \rrbracket</math></td><td><math>f_{22}</math></td></tr> <tr> <td><math>\{\neg A_1, A_2, B_1, B_2, B_3\}</math></td><td><math>\llbracket x_1 \in [1, 2] \rrbracket, \llbracket x_2 \in [2, 3] \rrbracket</math></td><td><math>f_3</math></td></tr> <tr> <td><math>\{\neg A_1, A_2, B_1, B_2, \neg B_3\}</math></td><td><math>\llbracket x_1 \in [1, 2] \rrbracket, \llbracket x_2 \in [1, 2] \rrbracket</math></td><td><math>f_3</math></td></tr> <tr> <td><math>\{\neg A_1, A_2, B_1, \neg B_2, \neg B_3\}</math></td><td><math>\llbracket x_1 \in [1, 2] \rrbracket, \llbracket x_2 \in [0, 1] \rrbracket</math></td><td><math>f_3</math></td></tr> <tr> <td><math>\{\neg A_1, A_2, \neg B_1, B_2, B_3\}</math></td><td><math>\llbracket x_1 \in [0, 1] \rrbracket, \llbracket x_2 \in [2, 3] \rrbracket</math></td><td><math>f_3</math></td></tr> <tr> <td><math>\{\neg A_1, A_2, \neg B_1, B_2, \neg B_3\}</math></td><td><math>\llbracket x_1 \in [0, 1] \rrbracket, \llbracket x_2 \in [1, 2] \rrbracket</math></td><td><math>f_3</math></td></tr> <tr> <td><math>\{\neg A_1, A_2, \neg B_1, \neg B_2, \neg B_3\}</math></td><td><math>\llbracket x_1 \in [0, 1] \rrbracket, \llbracket x_2 \in [0, 1] \rrbracket</math></td><td><math>f_3</math></td></tr> <tr> <td><math>\{\neg A_1, \neg A_2, B_1, B_2, B_3\}</math></td><td><math>\llbracket x_1 \in [1, 2] \rrbracket, \llbracket x_2 \in [2, 3] \rrbracket</math></td><td><math>f_4</math></td></tr> <tr> <td><math>\vdots [\text{same as with } \{\neg A_1, A_2\}]</math></td><td><math>\vdots</math></td><td><math>\vdots</math></td></tr> <tr> <td><math>\{\neg A_1, \neg A_2, \neg B_1, \neg B_2, \neg B_3\}</math></td><td><math>\llbracket x_1 \in [0, 1] \rrbracket, \llbracket x_2 \in [0, 1] \rrbracket</math></td><td><math>f_4</math></td></tr> </tbody> </table> | Assignment | Range | $w$ | $\{A_1, A_2, B_1, B_2, B_3\}$ | $\llbracket x_1 \in [1, 2] \rrbracket, \llbracket x_2 \in [2, 3] \rrbracket$ | $f_{11}$ | $\{A_1, A_2, B_1, B_2, \neg B_3\}$ | $\llbracket x_1 \in [1, 2] \rrbracket, \llbracket x_2 \in [1, 2] \rrbracket$ | $f_{11}$ | $\{A_1, A_2, B_1, \neg B_2, \neg B_3\}$ | $\llbracket x_1 \in [1, 2] \rrbracket, \llbracket x_2 \in [0, 1] \rrbracket$ | $f_{12}$ | $\{A_1, A_2, \neg B_1, B_2, B_3\}$ | $\llbracket x_1 \in [0, 1] \rrbracket, \llbracket x_2 \in [2, 3] \rrbracket$ | $f_{21}$ | $\{A_1, A_2, \neg B_1, B_2, \neg B_3\}$ | $\llbracket x_1 \in [0, 1] \rrbracket, \llbracket x_2 \in [1, 2] \rrbracket$ | $f_{22}$ | $\{A_1, A_2, \neg B_1, \neg B_2, \neg B_3\}$ | $\llbracket x_1 \in [0, 1] \rrbracket, \llbracket x_2 \in [0, 1] \rrbracket$ | $f_{22}$ | $\{A_1, \neg A_2, B_1, B_2, B_3\}$ | $\llbracket x_1 \in [1, 2] \rrbracket, \llbracket x_2 \in [2, 3] \rrbracket$ | $f_{11}$ | $\vdots [\text{same as with } \{A_1, A_2\}]$ | $\vdots$ | $\vdots$ | $\{A_1, \neg A_2, \neg B_1, \neg B_2, \neg B_3\}$ | $\llbracket x_1 \in [0, 1] \rrbracket, \llbracket x_2 \in [0, 1] \rrbracket$ | $f_{22}$ | $\{\neg A_1, A_2, B_1, B_2, B_3\}$ | $\llbracket x_1 \in [1, 2] \rrbracket, \llbracket x_2 \in [2, 3] \rrbracket$ | $f_3$ | $\{\neg A_1, A_2, B_1, B_2, \neg B_3\}$ | $\llbracket x_1 \in [1, 2] \rrbracket, \llbracket x_2 \in [1, 2] \rrbracket$ | $f_3$ | $\{\neg A_1, A_2, B_1, \neg B_2, \neg B_3\}$ | $\llbracket x_1 \in [1, 2] \rrbracket, \llbracket x_2 \in [0, 1] \rrbracket$ | $f_3$ | $\{\neg A_1, A_2, \neg B_1, B_2, B_3\}$ | $\llbracket x_1 \in [0, 1] \rrbracket, \llbracket x_2 \in [2, 3] \rrbracket$ | $f_3$ | $\{\neg A_1, A_2, \neg B_1, B_2, \neg B_3\}$ | $\llbracket x_1 \in [0, 1] \rrbracket, \llbracket x_2 \in [1, 2] \rrbracket$ | $f_3$ | $\{\neg A_1, A_2, \neg B_1, \neg B_2, \neg B_3\}$ | $\llbracket x_1 \in [0, 1] \rrbracket, \llbracket x_2 \in [0, 1] \rrbracket$ | $f_3$ | $\{\neg A_1, \neg A_2, B_1, B_2, B_3\}$ | $\llbracket x_1 \in [1, 2] \rrbracket, \llbracket x_2 \in [2, 3] \rrbracket$ | $f_4$ | $\vdots [\text{same as with } \{\neg A_1, A_2\}]$ | $\vdots$ | $\vdots$ | $\{\neg A_1, \neg A_2, \neg B_1, \neg B_2, \neg B_3\}$ | $\llbracket x_1 \in [0, 1] \rrbracket, \llbracket x_2 \in [0, 1] \rrbracket$ | $f_4$ |
|------------------------------------------------------------------------------------------------------------------------------------------------------------------|--------------------------------------------------------------------------------------------------------------------------------------------------------------------------------------------------------------------------------------|--------------------------------------------------------------------------------------------------------------------------------------------------------------------------------------------------------------------------------------------------------------------------------------------------------------------------------------------------------------------------------------------------------------------------------------------------------------------------------------------------------------------------------------------------------------------------------------------------------------------------------------------------------------------------------------------------------------------------------------------------------------------------------------------------------------------------------------------------------------------------------------------------------------------------------------------------------------------------------------------------------------------------------------------------------------------------------------------------------------------------------------------------------------------------------------------------------------------------------------------------------------------------------------------------------------------------------------------------------------------------------------------------------------------------------------------------------------------------------------------------------------------------------------------------------------------------------------------------------------------------------------------------------------------------------------------------------------------------------------------------------------------------------------------------------------------------------------------------------------------------------------------------------------------------------------------------------------------------------------------------------------------------------------------------------------------------------------------------------------------------------------------------------------------------------------------------------------------------------------------------------------------------------------------------------------------------------------------------------------------------------------------------------------------------------------------------------------------------------------------------------------------------------------------------------------------------------------------------------------------------------------------------------------------------------------------------------------------------------------------------------------------------------------------------------------------------------------------------------------------------------------------------------------------------------------------------------------------------------------------------------------------------------------------------------------------------------------------------------------------------------------------------------------------------------------------------------------------------------------------------------------------------------------------------------------------------------------------------------------------------------------------------------------------------------------------------------------------------------------------------------------------------------------------------------------------------------------------------------------------------------------------------|------------|-------|-----|-------------------------------|------------------------------------------------------------------------------|----------|------------------------------------|------------------------------------------------------------------------------|----------|-----------------------------------------|------------------------------------------------------------------------------|----------|------------------------------------|------------------------------------------------------------------------------|----------|-----------------------------------------|------------------------------------------------------------------------------|----------|----------------------------------------------|------------------------------------------------------------------------------|----------|------------------------------------|------------------------------------------------------------------------------|----------|----------------------------------------------|----------|----------|---------------------------------------------------|------------------------------------------------------------------------------|----------|------------------------------------|------------------------------------------------------------------------------|-------|-----------------------------------------|------------------------------------------------------------------------------|-------|----------------------------------------------|------------------------------------------------------------------------------|-------|-----------------------------------------|------------------------------------------------------------------------------|-------|----------------------------------------------|------------------------------------------------------------------------------|-------|---------------------------------------------------|------------------------------------------------------------------------------|-------|-----------------------------------------|------------------------------------------------------------------------------|-------|---------------------------------------------------|----------|----------|--------------------------------------------------------|------------------------------------------------------------------------------|-------|
| Assignment                                                                                                                                                       | Range                                                                                                                                                                                                                                | $w$                                                                                                                                                                                                                                                                                                                                                                                                                                                                                                                                                                                                                                                                                                                                                                                                                                                                                                                                                                                                                                                                                                                                                                                                                                                                                                                                                                                                                                                                                                                                                                                                                                                                                                                                                                                                                                                                                                                                                                                                                                                                                                                                                                                                                                                                                                                                                                                                                                                                                                                                                                                                                                                                                                                                                                                                                                                                                                                                                                                                                                                                                                                                                                                                                                                                                                                                                                                                                                                                                                                                                                                                                                              |            |       |     |                               |                                                                              |          |                                    |                                                                              |          |                                         |                                                                              |          |                                    |                                                                              |          |                                         |                                                                              |          |                                              |                                                                              |          |                                    |                                                                              |          |                                              |          |          |                                                   |                                                                              |          |                                    |                                                                              |       |                                         |                                                                              |       |                                              |                                                                              |       |                                         |                                                                              |       |                                              |                                                                              |       |                                                   |                                                                              |       |                                         |                                                                              |       |                                                   |          |          |                                                        |                                                                              |       |
| $\{A_1, A_2, B_1, B_2, B_3\}$                                                                                                                                    | $\llbracket x_1 \in [1, 2] \rrbracket, \llbracket x_2 \in [2, 3] \rrbracket$                                                                                                                                                         | $f_{11}$                                                                                                                                                                                                                                                                                                                                                                                                                                                                                                                                                                                                                                                                                                                                                                                                                                                                                                                                                                                                                                                                                                                                                                                                                                                                                                                                                                                                                                                                                                                                                                                                                                                                                                                                                                                                                                                                                                                                                                                                                                                                                                                                                                                                                                                                                                                                                                                                                                                                                                                                                                                                                                                                                                                                                                                                                                                                                                                                                                                                                                                                                                                                                                                                                                                                                                                                                                                                                                                                                                                                                                                                                                         |            |       |     |                               |                                                                              |          |                                    |                                                                              |          |                                         |                                                                              |          |                                    |                                                                              |          |                                         |                                                                              |          |                                              |                                                                              |          |                                    |                                                                              |          |                                              |          |          |                                                   |                                                                              |          |                                    |                                                                              |       |                                         |                                                                              |       |                                              |                                                                              |       |                                         |                                                                              |       |                                              |                                                                              |       |                                                   |                                                                              |       |                                         |                                                                              |       |                                                   |          |          |                                                        |                                                                              |       |
| $\{A_1, A_2, B_1, B_2, \neg B_3\}$                                                                                                                               | $\llbracket x_1 \in [1, 2] \rrbracket, \llbracket x_2 \in [1, 2] \rrbracket$                                                                                                                                                         | $f_{11}$                                                                                                                                                                                                                                                                                                                                                                                                                                                                                                                                                                                                                                                                                                                                                                                                                                                                                                                                                                                                                                                                                                                                                                                                                                                                                                                                                                                                                                                                                                                                                                                                                                                                                                                                                                                                                                                                                                                                                                                                                                                                                                                                                                                                                                                                                                                                                                                                                                                                                                                                                                                                                                                                                                                                                                                                                                                                                                                                                                                                                                                                                                                                                                                                                                                                                                                                                                                                                                                                                                                                                                                                                                         |            |       |     |                               |                                                                              |          |                                    |                                                                              |          |                                         |                                                                              |          |                                    |                                                                              |          |                                         |                                                                              |          |                                              |                                                                              |          |                                    |                                                                              |          |                                              |          |          |                                                   |                                                                              |          |                                    |                                                                              |       |                                         |                                                                              |       |                                              |                                                                              |       |                                         |                                                                              |       |                                              |                                                                              |       |                                                   |                                                                              |       |                                         |                                                                              |       |                                                   |          |          |                                                        |                                                                              |       |
| $\{A_1, A_2, B_1, \neg B_2, \neg B_3\}$                                                                                                                          | $\llbracket x_1 \in [1, 2] \rrbracket, \llbracket x_2 \in [0, 1] \rrbracket$                                                                                                                                                         | $f_{12}$                                                                                                                                                                                                                                                                                                                                                                                                                                                                                                                                                                                                                                                                                                                                                                                                                                                                                                                                                                                                                                                                                                                                                                                                                                                                                                                                                                                                                                                                                                                                                                                                                                                                                                                                                                                                                                                                                                                                                                                                                                                                                                                                                                                                                                                                                                                                                                                                                                                                                                                                                                                                                                                                                                                                                                                                                                                                                                                                                                                                                                                                                                                                                                                                                                                                                                                                                                                                                                                                                                                                                                                                                                         |            |       |     |                               |                                                                              |          |                                    |                                                                              |          |                                         |                                                                              |          |                                    |                                                                              |          |                                         |                                                                              |          |                                              |                                                                              |          |                                    |                                                                              |          |                                              |          |          |                                                   |                                                                              |          |                                    |                                                                              |       |                                         |                                                                              |       |                                              |                                                                              |       |                                         |                                                                              |       |                                              |                                                                              |       |                                                   |                                                                              |       |                                         |                                                                              |       |                                                   |          |          |                                                        |                                                                              |       |
| $\{A_1, A_2, \neg B_1, B_2, B_3\}$                                                                                                                               | $\llbracket x_1 \in [0, 1] \rrbracket, \llbracket x_2 \in [2, 3] \rrbracket$                                                                                                                                                         | $f_{21}$                                                                                                                                                                                                                                                                                                                                                                                                                                                                                                                                                                                                                                                                                                                                                                                                                                                                                                                                                                                                                                                                                                                                                                                                                                                                                                                                                                                                                                                                                                                                                                                                                                                                                                                                                                                                                                                                                                                                                                                                                                                                                                                                                                                                                                                                                                                                                                                                                                                                                                                                                                                                                                                                                                                                                                                                                                                                                                                                                                                                                                                                                                                                                                                                                                                                                                                                                                                                                                                                                                                                                                                                                                         |            |       |     |                               |                                                                              |          |                                    |                                                                              |          |                                         |                                                                              |          |                                    |                                                                              |          |                                         |                                                                              |          |                                              |                                                                              |          |                                    |                                                                              |          |                                              |          |          |                                                   |                                                                              |          |                                    |                                                                              |       |                                         |                                                                              |       |                                              |                                                                              |       |                                         |                                                                              |       |                                              |                                                                              |       |                                                   |                                                                              |       |                                         |                                                                              |       |                                                   |          |          |                                                        |                                                                              |       |
| $\{A_1, A_2, \neg B_1, B_2, \neg B_3\}$                                                                                                                          | $\llbracket x_1 \in [0, 1] \rrbracket, \llbracket x_2 \in [1, 2] \rrbracket$                                                                                                                                                         | $f_{22}$                                                                                                                                                                                                                                                                                                                                                                                                                                                                                                                                                                                                                                                                                                                                                                                                                                                                                                                                                                                                                                                                                                                                                                                                                                                                                                                                                                                                                                                                                                                                                                                                                                                                                                                                                                                                                                                                                                                                                                                                                                                                                                                                                                                                                                                                                                                                                                                                                                                                                                                                                                                                                                                                                                                                                                                                                                                                                                                                                                                                                                                                                                                                                                                                                                                                                                                                                                                                                                                                                                                                                                                                                                         |            |       |     |                               |                                                                              |          |                                    |                                                                              |          |                                         |                                                                              |          |                                    |                                                                              |          |                                         |                                                                              |          |                                              |                                                                              |          |                                    |                                                                              |          |                                              |          |          |                                                   |                                                                              |          |                                    |                                                                              |       |                                         |                                                                              |       |                                              |                                                                              |       |                                         |                                                                              |       |                                              |                                                                              |       |                                                   |                                                                              |       |                                         |                                                                              |       |                                                   |          |          |                                                        |                                                                              |       |
| $\{A_1, A_2, \neg B_1, \neg B_2, \neg B_3\}$                                                                                                                     | $\llbracket x_1 \in [0, 1] \rrbracket, \llbracket x_2 \in [0, 1] \rrbracket$                                                                                                                                                         | $f_{22}$                                                                                                                                                                                                                                                                                                                                                                                                                                                                                                                                                                                                                                                                                                                                                                                                                                                                                                                                                                                                                                                                                                                                                                                                                                                                                                                                                                                                                                                                                                                                                                                                                                                                                                                                                                                                                                                                                                                                                                                                                                                                                                                                                                                                                                                                                                                                                                                                                                                                                                                                                                                                                                                                                                                                                                                                                                                                                                                                                                                                                                                                                                                                                                                                                                                                                                                                                                                                                                                                                                                                                                                                                                         |            |       |     |                               |                                                                              |          |                                    |                                                                              |          |                                         |                                                                              |          |                                    |                                                                              |          |                                         |                                                                              |          |                                              |                                                                              |          |                                    |                                                                              |          |                                              |          |          |                                                   |                                                                              |          |                                    |                                                                              |       |                                         |                                                                              |       |                                              |                                                                              |       |                                         |                                                                              |       |                                              |                                                                              |       |                                                   |                                                                              |       |                                         |                                                                              |       |                                                   |          |          |                                                        |                                                                              |       |
| $\{A_1, \neg A_2, B_1, B_2, B_3\}$                                                                                                                               | $\llbracket x_1 \in [1, 2] \rrbracket, \llbracket x_2 \in [2, 3] \rrbracket$                                                                                                                                                         | $f_{11}$                                                                                                                                                                                                                                                                                                                                                                                                                                                                                                                                                                                                                                                                                                                                                                                                                                                                                                                                                                                                                                                                                                                                                                                                                                                                                                                                                                                                                                                                                                                                                                                                                                                                                                                                                                                                                                                                                                                                                                                                                                                                                                                                                                                                                                                                                                                                                                                                                                                                                                                                                                                                                                                                                                                                                                                                                                                                                                                                                                                                                                                                                                                                                                                                                                                                                                                                                                                                                                                                                                                                                                                                                                         |            |       |     |                               |                                                                              |          |                                    |                                                                              |          |                                         |                                                                              |          |                                    |                                                                              |          |                                         |                                                                              |          |                                              |                                                                              |          |                                    |                                                                              |          |                                              |          |          |                                                   |                                                                              |          |                                    |                                                                              |       |                                         |                                                                              |       |                                              |                                                                              |       |                                         |                                                                              |       |                                              |                                                                              |       |                                                   |                                                                              |       |                                         |                                                                              |       |                                                   |          |          |                                                        |                                                                              |       |
| $\vdots [\text{same as with } \{A_1, A_2\}]$                                                                                                                     | $\vdots$                                                                                                                                                                                                                             | $\vdots$                                                                                                                                                                                                                                                                                                                                                                                                                                                                                                                                                                                                                                                                                                                                                                                                                                                                                                                                                                                                                                                                                                                                                                                                                                                                                                                                                                                                                                                                                                                                                                                                                                                                                                                                                                                                                                                                                                                                                                                                                                                                                                                                                                                                                                                                                                                                                                                                                                                                                                                                                                                                                                                                                                                                                                                                                                                                                                                                                                                                                                                                                                                                                                                                                                                                                                                                                                                                                                                                                                                                                                                                                                         |            |       |     |                               |                                                                              |          |                                    |                                                                              |          |                                         |                                                                              |          |                                    |                                                                              |          |                                         |                                                                              |          |                                              |                                                                              |          |                                    |                                                                              |          |                                              |          |          |                                                   |                                                                              |          |                                    |                                                                              |       |                                         |                                                                              |       |                                              |                                                                              |       |                                         |                                                                              |       |                                              |                                                                              |       |                                                   |                                                                              |       |                                         |                                                                              |       |                                                   |          |          |                                                        |                                                                              |       |
| $\{A_1, \neg A_2, \neg B_1, \neg B_2, \neg B_3\}$                                                                                                                | $\llbracket x_1 \in [0, 1] \rrbracket, \llbracket x_2 \in [0, 1] \rrbracket$                                                                                                                                                         | $f_{22}$                                                                                                                                                                                                                                                                                                                                                                                                                                                                                                                                                                                                                                                                                                                                                                                                                                                                                                                                                                                                                                                                                                                                                                                                                                                                                                                                                                                                                                                                                                                                                                                                                                                                                                                                                                                                                                                                                                                                                                                                                                                                                                                                                                                                                                                                                                                                                                                                                                                                                                                                                                                                                                                                                                                                                                                                                                                                                                                                                                                                                                                                                                                                                                                                                                                                                                                                                                                                                                                                                                                                                                                                                                         |            |       |     |                               |                                                                              |          |                                    |                                                                              |          |                                         |                                                                              |          |                                    |                                                                              |          |                                         |                                                                              |          |                                              |                                                                              |          |                                    |                                                                              |          |                                              |          |          |                                                   |                                                                              |          |                                    |                                                                              |       |                                         |                                                                              |       |                                              |                                                                              |       |                                         |                                                                              |       |                                              |                                                                              |       |                                                   |                                                                              |       |                                         |                                                                              |       |                                                   |          |          |                                                        |                                                                              |       |
| $\{\neg A_1, A_2, B_1, B_2, B_3\}$                                                                                                                               | $\llbracket x_1 \in [1, 2] \rrbracket, \llbracket x_2 \in [2, 3] \rrbracket$                                                                                                                                                         | $f_3$                                                                                                                                                                                                                                                                                                                                                                                                                                                                                                                                                                                                                                                                                                                                                                                                                                                                                                                                                                                                                                                                                                                                                                                                                                                                                                                                                                                                                                                                                                                                                                                                                                                                                                                                                                                                                                                                                                                                                                                                                                                                                                                                                                                                                                                                                                                                                                                                                                                                                                                                                                                                                                                                                                                                                                                                                                                                                                                                                                                                                                                                                                                                                                                                                                                                                                                                                                                                                                                                                                                                                                                                                                            |            |       |     |                               |                                                                              |          |                                    |                                                                              |          |                                         |                                                                              |          |                                    |                                                                              |          |                                         |                                                                              |          |                                              |                                                                              |          |                                    |                                                                              |          |                                              |          |          |                                                   |                                                                              |          |                                    |                                                                              |       |                                         |                                                                              |       |                                              |                                                                              |       |                                         |                                                                              |       |                                              |                                                                              |       |                                                   |                                                                              |       |                                         |                                                                              |       |                                                   |          |          |                                                        |                                                                              |       |
| $\{\neg A_1, A_2, B_1, B_2, \neg B_3\}$                                                                                                                          | $\llbracket x_1 \in [1, 2] \rrbracket, \llbracket x_2 \in [1, 2] \rrbracket$                                                                                                                                                         | $f_3$                                                                                                                                                                                                                                                                                                                                                                                                                                                                                                                                                                                                                                                                                                                                                                                                                                                                                                                                                                                                                                                                                                                                                                                                                                                                                                                                                                                                                                                                                                                                                                                                                                                                                                                                                                                                                                                                                                                                                                                                                                                                                                                                                                                                                                                                                                                                                                                                                                                                                                                                                                                                                                                                                                                                                                                                                                                                                                                                                                                                                                                                                                                                                                                                                                                                                                                                                                                                                                                                                                                                                                                                                                            |            |       |     |                               |                                                                              |          |                                    |                                                                              |          |                                         |                                                                              |          |                                    |                                                                              |          |                                         |                                                                              |          |                                              |                                                                              |          |                                    |                                                                              |          |                                              |          |          |                                                   |                                                                              |          |                                    |                                                                              |       |                                         |                                                                              |       |                                              |                                                                              |       |                                         |                                                                              |       |                                              |                                                                              |       |                                                   |                                                                              |       |                                         |                                                                              |       |                                                   |          |          |                                                        |                                                                              |       |
| $\{\neg A_1, A_2, B_1, \neg B_2, \neg B_3\}$                                                                                                                     | $\llbracket x_1 \in [1, 2] \rrbracket, \llbracket x_2 \in [0, 1] \rrbracket$                                                                                                                                                         | $f_3$                                                                                                                                                                                                                                                                                                                                                                                                                                                                                                                                                                                                                                                                                                                                                                                                                                                                                                                                                                                                                                                                                                                                                                                                                                                                                                                                                                                                                                                                                                                                                                                                                                                                                                                                                                                                                                                                                                                                                                                                                                                                                                                                                                                                                                                                                                                                                                                                                                                                                                                                                                                                                                                                                                                                                                                                                                                                                                                                                                                                                                                                                                                                                                                                                                                                                                                                                                                                                                                                                                                                                                                                                                            |            |       |     |                               |                                                                              |          |                                    |                                                                              |          |                                         |                                                                              |          |                                    |                                                                              |          |                                         |                                                                              |          |                                              |                                                                              |          |                                    |                                                                              |          |                                              |          |          |                                                   |                                                                              |          |                                    |                                                                              |       |                                         |                                                                              |       |                                              |                                                                              |       |                                         |                                                                              |       |                                              |                                                                              |       |                                                   |                                                                              |       |                                         |                                                                              |       |                                                   |          |          |                                                        |                                                                              |       |
| $\{\neg A_1, A_2, \neg B_1, B_2, B_3\}$                                                                                                                          | $\llbracket x_1 \in [0, 1] \rrbracket, \llbracket x_2 \in [2, 3] \rrbracket$                                                                                                                                                         | $f_3$                                                                                                                                                                                                                                                                                                                                                                                                                                                                                                                                                                                                                                                                                                                                                                                                                                                                                                                                                                                                                                                                                                                                                                                                                                                                                                                                                                                                                                                                                                                                                                                                                                                                                                                                                                                                                                                                                                                                                                                                                                                                                                                                                                                                                                                                                                                                                                                                                                                                                                                                                                                                                                                                                                                                                                                                                                                                                                                                                                                                                                                                                                                                                                                                                                                                                                                                                                                                                                                                                                                                                                                                                                            |            |       |     |                               |                                                                              |          |                                    |                                                                              |          |                                         |                                                                              |          |                                    |                                                                              |          |                                         |                                                                              |          |                                              |                                                                              |          |                                    |                                                                              |          |                                              |          |          |                                                   |                                                                              |          |                                    |                                                                              |       |                                         |                                                                              |       |                                              |                                                                              |       |                                         |                                                                              |       |                                              |                                                                              |       |                                                   |                                                                              |       |                                         |                                                                              |       |                                                   |          |          |                                                        |                                                                              |       |
| $\{\neg A_1, A_2, \neg B_1, B_2, \neg B_3\}$                                                                                                                     | $\llbracket x_1 \in [0, 1] \rrbracket, \llbracket x_2 \in [1, 2] \rrbracket$                                                                                                                                                         | $f_3$                                                                                                                                                                                                                                                                                                                                                                                                                                                                                                                                                                                                                                                                                                                                                                                                                                                                                                                                                                                                                                                                                                                                                                                                                                                                                                                                                                                                                                                                                                                                                                                                                                                                                                                                                                                                                                                                                                                                                                                                                                                                                                                                                                                                                                                                                                                                                                                                                                                                                                                                                                                                                                                                                                                                                                                                                                                                                                                                                                                                                                                                                                                                                                                                                                                                                                                                                                                                                                                                                                                                                                                                                                            |            |       |     |                               |                                                                              |          |                                    |                                                                              |          |                                         |                                                                              |          |                                    |                                                                              |          |                                         |                                                                              |          |                                              |                                                                              |          |                                    |                                                                              |          |                                              |          |          |                                                   |                                                                              |          |                                    |                                                                              |       |                                         |                                                                              |       |                                              |                                                                              |       |                                         |                                                                              |       |                                              |                                                                              |       |                                                   |                                                                              |       |                                         |                                                                              |       |                                                   |          |          |                                                        |                                                                              |       |
| $\{\neg A_1, A_2, \neg B_1, \neg B_2, \neg B_3\}$                                                                                                                | $\llbracket x_1 \in [0, 1] \rrbracket, \llbracket x_2 \in [0, 1] \rrbracket$                                                                                                                                                         | $f_3$                                                                                                                                                                                                                                                                                                                                                                                                                                                                                                                                                                                                                                                                                                                                                                                                                                                                                                                                                                                                                                                                                                                                                                                                                                                                                                                                                                                                                                                                                                                                                                                                                                                                                                                                                                                                                                                                                                                                                                                                                                                                                                                                                                                                                                                                                                                                                                                                                                                                                                                                                                                                                                                                                                                                                                                                                                                                                                                                                                                                                                                                                                                                                                                                                                                                                                                                                                                                                                                                                                                                                                                                                                            |            |       |     |                               |                                                                              |          |                                    |                                                                              |          |                                         |                                                                              |          |                                    |                                                                              |          |                                         |                                                                              |          |                                              |                                                                              |          |                                    |                                                                              |          |                                              |          |          |                                                   |                                                                              |          |                                    |                                                                              |       |                                         |                                                                              |       |                                              |                                                                              |       |                                         |                                                                              |       |                                              |                                                                              |       |                                                   |                                                                              |       |                                         |                                                                              |       |                                                   |          |          |                                                        |                                                                              |       |
| $\{\neg A_1, \neg A_2, B_1, B_2, B_3\}$                                                                                                                          | $\llbracket x_1 \in [1, 2] \rrbracket, \llbracket x_2 \in [2, 3] \rrbracket$                                                                                                                                                         | $f_4$                                                                                                                                                                                                                                                                                                                                                                                                                                                                                                                                                                                                                                                                                                                                                                                                                                                                                                                                                                                                                                                                                                                                                                                                                                                                                                                                                                                                                                                                                                                                                                                                                                                                                                                                                                                                                                                                                                                                                                                                                                                                                                                                                                                                                                                                                                                                                                                                                                                                                                                                                                                                                                                                                                                                                                                                                                                                                                                                                                                                                                                                                                                                                                                                                                                                                                                                                                                                                                                                                                                                                                                                                                            |            |       |     |                               |                                                                              |          |                                    |                                                                              |          |                                         |                                                                              |          |                                    |                                                                              |          |                                         |                                                                              |          |                                              |                                                                              |          |                                    |                                                                              |          |                                              |          |          |                                                   |                                                                              |          |                                    |                                                                              |       |                                         |                                                                              |       |                                              |                                                                              |       |                                         |                                                                              |       |                                              |                                                                              |       |                                                   |                                                                              |       |                                         |                                                                              |       |                                                   |          |          |                                                        |                                                                              |       |
| $\vdots [\text{same as with } \{\neg A_1, A_2\}]$                                                                                                                | $\vdots$                                                                                                                                                                                                                             | $\vdots$                                                                                                                                                                                                                                                                                                                                                                                                                                                                                                                                                                                                                                                                                                                                                                                                                                                                                                                                                                                                                                                                                                                                                                                                                                                                                                                                                                                                                                                                                                                                                                                                                                                                                                                                                                                                                                                                                                                                                                                                                                                                                                                                                                                                                                                                                                                                                                                                                                                                                                                                                                                                                                                                                                                                                                                                                                                                                                                                                                                                                                                                                                                                                                                                                                                                                                                                                                                                                                                                                                                                                                                                                                         |            |       |     |                               |                                                                              |          |                                    |                                                                              |          |                                         |                                                                              |          |                                    |                                                                              |          |                                         |                                                                              |          |                                              |                                                                              |          |                                    |                                                                              |          |                                              |          |          |                                                   |                                                                              |          |                                    |                                                                              |       |                                         |                                                                              |       |                                              |                                                                              |       |                                         |                                                                              |       |                                              |                                                                              |       |                                                   |                                                                              |       |                                         |                                                                              |       |                                                   |          |          |                                                        |                                                                              |       |
| $\{\neg A_1, \neg A_2, \neg B_1, \neg B_2, \neg B_3\}$                                                                                                           | $\llbracket x_1 \in [0, 1] \rrbracket, \llbracket x_2 \in [0, 1] \rrbracket$                                                                                                                                                         | $f_4$                                                                                                                                                                                                                                                                                                                                                                                                                                                                                                                                                                                                                                                                                                                                                                                                                                                                                                                                                                                                                                                                                                                                                                                                                                                                                                                                                                                                                                                                                                                                                                                                                                                                                                                                                                                                                                                                                                                                                                                                                                                                                                                                                                                                                                                                                                                                                                                                                                                                                                                                                                                                                                                                                                                                                                                                                                                                                                                                                                                                                                                                                                                                                                                                                                                                                                                                                                                                                                                                                                                                                                                                                                            |            |       |     |                               |                                                                              |          |                                    |                                                                              |          |                                         |                                                                              |          |                                    |                                                                              |          |                                         |                                                                              |          |                                              |                                                                              |          |                                    |                                                                              |          |                                              |          |          |                                                   |                                                                              |          |                                    |                                                                              |       |                                         |                                                                              |       |                                              |                                                                              |       |                                         |                                                                              |       |                                              |                                                                              |       |                                                   |                                                                              |       |                                         |                                                                              |       |                                                   |          |          |                                                        |                                                                              |       |
| <b>b</b> $w(\mathbf{x}, \mathbf{A})$ 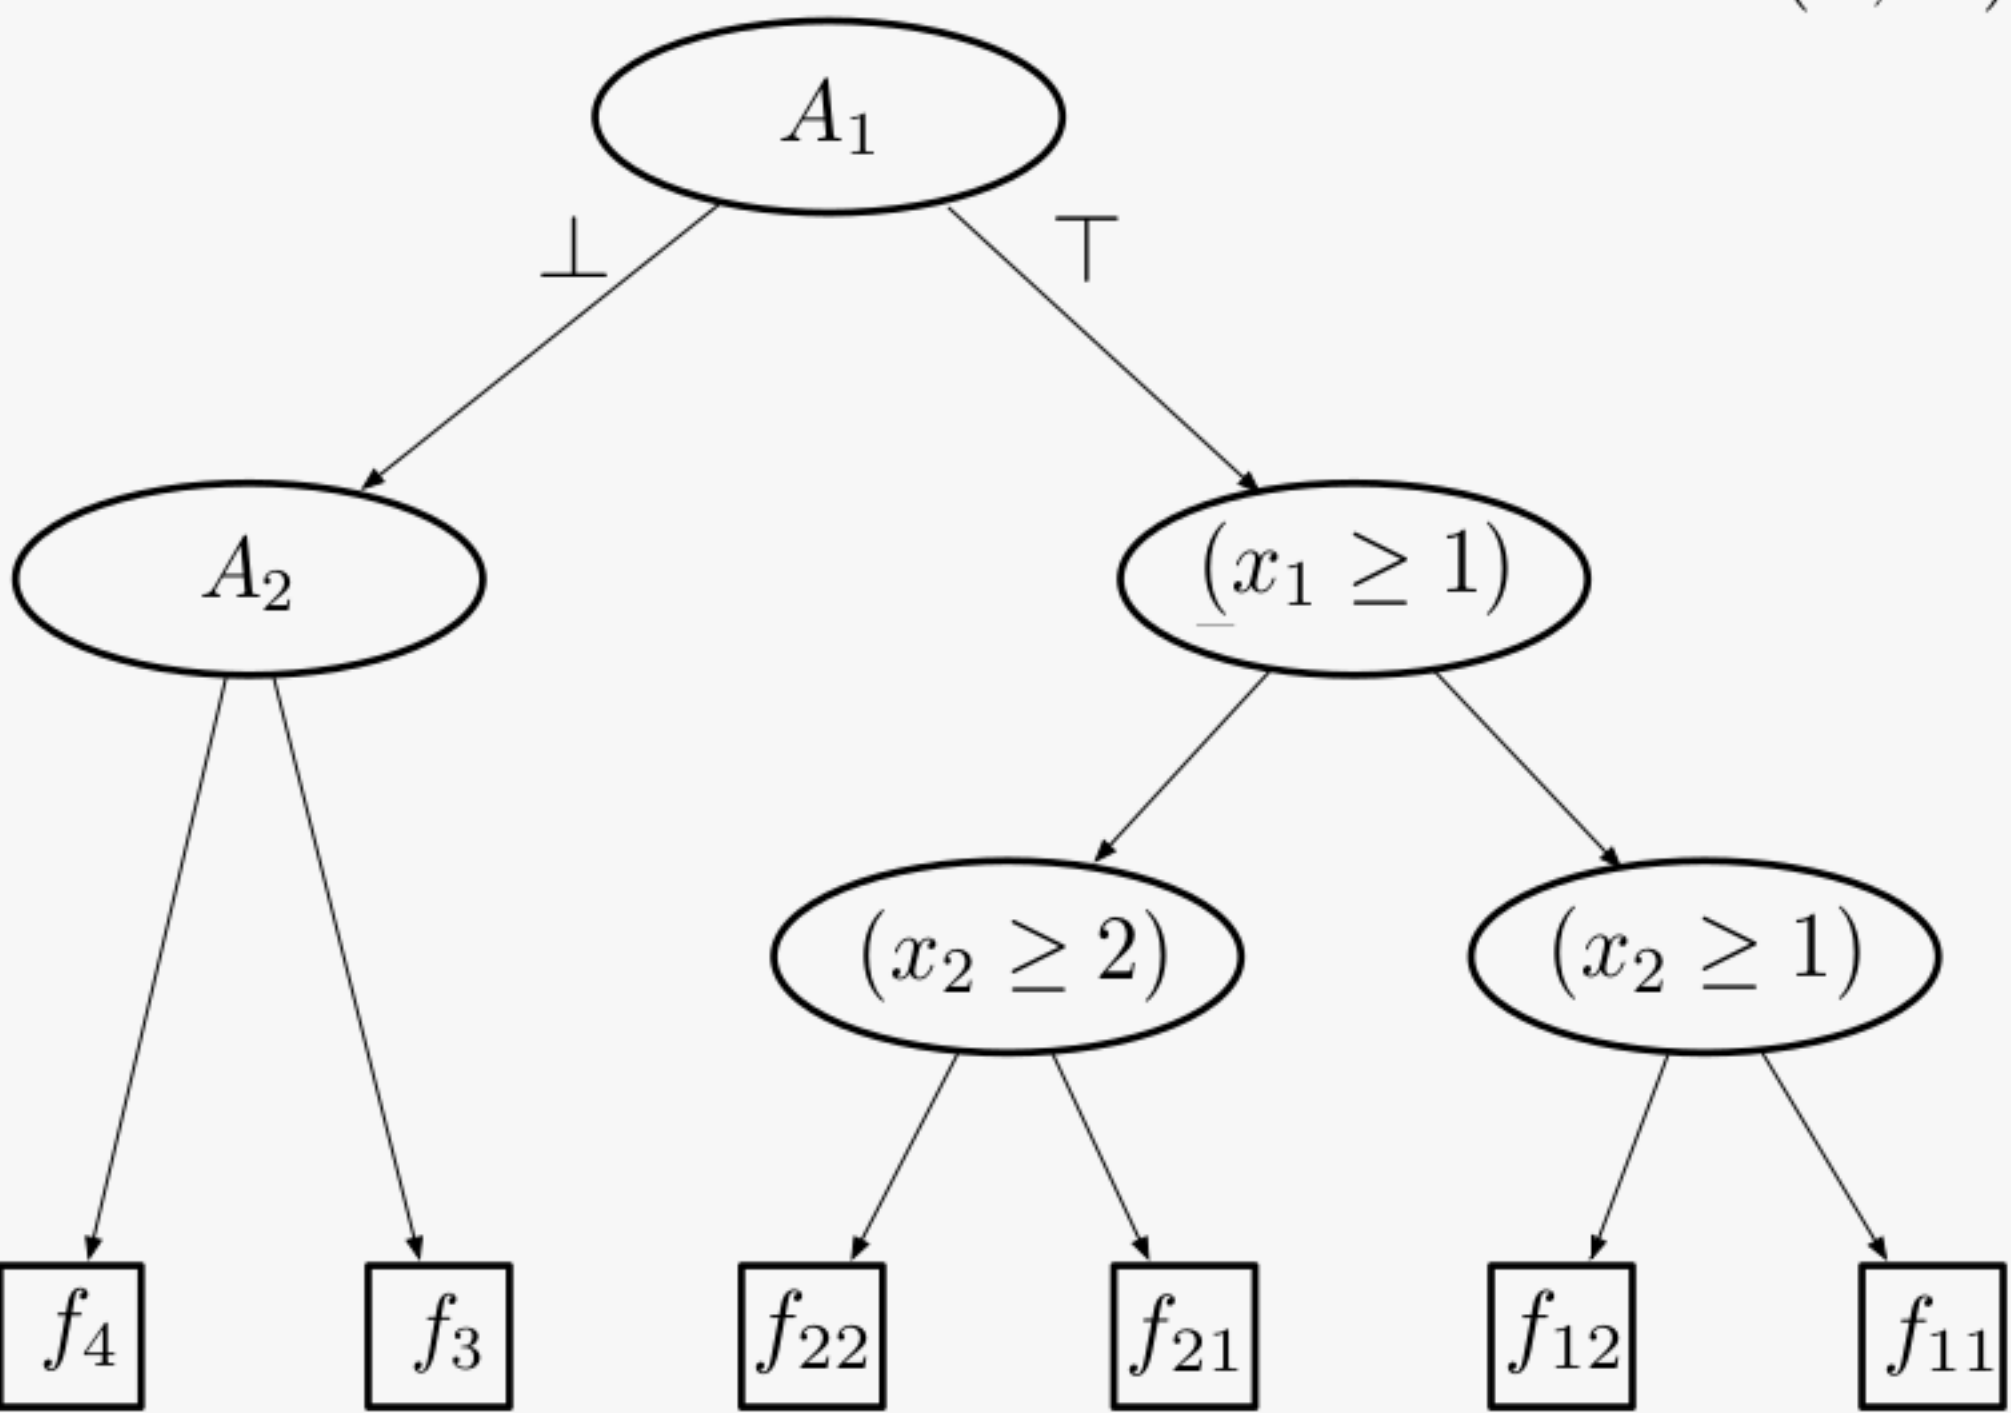                                         | <b>d</b> $w^*(\mathbf{x}, \mathbf{A} \cup \mathbf{B})$                                                                                           |                                                                                                                                                                                                                                                                                                                                                                                                                                                                                                                                                                                                                                                                                                                                                                                                                                                                                                                                                                                                                                                                                                                                                                                                                                                                                                                                                                                                                                                                                                                                                                                                                                                                                                                                                                                                                                                                                                                                                                                                                                                                                                                                                                                                                                                                                                                                                                                                                                                                                                                                                                                                                                                                                                                                                                                                                                                                                                                                                                                                                                                                                                                                                                                                                                                                                                                                                                                                                                                                                                                                                                                                                                                  |            |       |     |                               |                                                                              |          |                                    |                                                                              |          |                                         |                                                                              |          |                                    |                                                                              |          |                                         |                                                                              |          |                                              |                                                                              |          |                                    |                                                                              |          |                                              |          |          |                                                   |                                                                              |          |                                    |                                                                              |       |                                         |                                                                              |       |                                              |                                                                              |       |                                         |                                                                              |       |                                              |                                                                              |       |                                                   |                                                                              |       |                                         |                                                                              |       |                                                   |          |          |                                                        |                                                                              |       |
