# Supplementary material
Source: ML conference proceedings conference paper supplement (https://openreview.net/forum?id=HYWMtDLo5g5)
Supplement: supplementary_material [file attachment]

| <p><b>a</b></p> $\varphi \stackrel{\text{def}}{=} \top, \chi \stackrel{\text{def}}{=} \llbracket x_1 \in [0, 2] \rrbracket \wedge \llbracket x_2 \in [0, 3] \rrbracket$ | <p><b>c</b></p> $\varphi^*(\mathbf{x}, \mathbf{A} \cup \mathbf{B}) \stackrel{\text{def}}{=} \varphi \wedge \chi \wedge B_1 \leftrightarrow (x_1 \geq 1) \wedge \\ B_2 \leftrightarrow (x_2 \geq 1) \wedge B_3 \leftrightarrow (x_2 \geq 2)$ | <p><b>e</b></p> <table border="1"> <thead> <tr> <th>Assignment</th><th>Range</th><th><math>w</math></th></tr> </thead> <tbody> <tr> <td><math>\{A_1, A_2, B_1, B_2, B_3\}</math></td><td><math>\llbracket x_1 \in [1, 2] \rrbracket, \llbracket x_2 \in [2, 3] \rrbracket</math></td><td><math>x_1^2 x_2</math></td></tr> <tr> <td><math>\{A_1, A_2, B_1, B_2, \neg B_3\}</math></td><td><math>\llbracket x_1 \in [1, 2] \rrbracket, \llbracket x_2 \in [1, 2] \rrbracket</math></td><td><math>x_1^2 x_2</math></td></tr> <tr> <td><math>\{A_1, A_2, B_1, \neg B_2, \neg B_3\}</math></td><td><math>\llbracket x_1 \in [1, 2] \rrbracket, \llbracket x_2 \in [0, 1] \rrbracket</math></td><td><math>x_1^3 x_2</math></td></tr> <tr> <td><math>\{A_1, A_2, \neg B_1, B_2, B_3\}</math></td><td><math>\llbracket x_1 \in [0, 1] \rrbracket, \llbracket x_2 \in [2, 3] \rrbracket</math></td><td><math>x_1 x_2^2</math></td></tr> <tr> <td><math>\{A_1, A_2, \neg B_1, B_2, \neg B_3\}</math></td><td><math>\llbracket x_1 \in [0, 1] \rrbracket, \llbracket x_2 \in [1, 2] \rrbracket</math></td><td><math>x_1 x_2^3</math></td></tr> <tr> <td><math>\{A_1, A_2, \neg B_1, \neg B_2, \neg B_3\}</math></td><td><math>\llbracket x_1 \in [0, 1] \rrbracket, \llbracket x_2 \in [0, 1] \rrbracket</math></td><td><math>x_1 x_2^3</math></td></tr> <tr> <td><math>\{A_1, \neg A_2, B_1, B_2, B_3\}</math></td><td><math>\llbracket x_1 \in [1, 2] \rrbracket, \llbracket x_2 \in [2, 3] \rrbracket</math></td><td><math>x_1^2 x_2</math></td></tr> <tr> <td><math>\vdots</math> [same as with <math>\{A_1, A_2\}</math>]</td><td><math>\vdots</math></td><td><math>\vdots</math></td></tr> <tr> <td><math>\{A_1, \neg A_2, \neg B_1, \neg B_2, \neg B_3\}</math></td><td><math>\llbracket x_1 \in [0, 1] \rrbracket, \llbracket x_2 \in [0, 1] \rrbracket</math></td><td><math>x_1 x_2^3</math></td></tr> <tr> <td><math>\{\neg A_1, A_2, B_1, B_2, B_3\}</math></td><td><math>\llbracket x_1 \in [1, 2] \rrbracket, \llbracket x_2 \in [2, 3] \rrbracket</math></td><td><math>2x_1 x_2</math></td></tr> <tr> <td><math>\{\neg A_1, A_2, B_1, B_2, \neg B_3\}</math></td><td><math>\llbracket x_1 \in [1, 2] \rrbracket, \llbracket x_2 \in [1, 2] \rrbracket</math></td><td><math>2x_1 x_2</math></td></tr> <tr> <td><math>\{\neg A_1, A_2, B_1, \neg B_2, \neg B_3\}</math></td><td><math>\llbracket x_1 \in [1, 2] \rrbracket, \llbracket x_2 \in [0, 1] \rrbracket</math></td><td><math>2x_1 x_2</math></td></tr> <tr> <td><math>\{\neg A_1, A_2, \neg B_1, B_2, B_3\}</math></td><td><math>\llbracket x_1 \in [0, 1] \rrbracket, \llbracket x_2 \in [2, 3] \rrbracket</math></td><td><math>2x_1 x_2</math></td></tr> <tr> <td><math>\{\neg A_1, A_2, \neg B_1, B_2, \neg B_3\}</math></td><td><math>\llbracket x_1 \in [0, 1] \rrbracket, \llbracket x_2 \in [1, 2] \rrbracket</math></td><td><math>2x_1 x_2</math></td></tr> <tr> <td><math>\{\neg A_1, A_2, \neg B_1, \neg B_2, \neg B_3\}</math></td><td><math>\llbracket x_1 \in [0, 1] \rrbracket, \llbracket x_2 \in [0, 1] \rrbracket</math></td><td><math>2x_1 x_2</math></td></tr> <tr> <td><math>\{\neg A_1, \neg A_2, B_1, B_2, B_3\}</math></td><td><math>\llbracket x_1 \in [1, 2] \rrbracket, \llbracket x_2 \in [2, 3] \rrbracket</math></td><td><math>3x_1 x_2</math></td></tr> <tr> <td><math>\vdots</math> [same as with <math>\{\neg A_1, A_2\}</math>]</td><td><math>\vdots</math></td><td><math>\vdots</math></td></tr> <tr> <td><math>\{\neg A_1, \neg A_2, \neg B_1, \neg B_2, \neg B_3\}</math></td><td><math>\llbracket x_1 \in [0, 1] \rrbracket, \llbracket x_2 \in [0, 1] \rrbracket</math></td><td><math>3x_1 x_2</math></td></tr> </tbody> </table> | Assignment | Range | $w$ | $\{A_1, A_2, B_1, B_2, B_3\}$ | $\llbracket x_1 \in [1, 2] \rrbracket, \llbracket x_2 \in [2, 3] \rrbracket$ | $x_1^2 x_2$ | $\{A_1, A_2, B_1, B_2, \neg B_3\}$ | $\llbracket x_1 \in [1, 2] \rrbracket, \llbracket x_2 \in [1, 2] \rrbracket$ | $x_1^2 x_2$ | $\{A_1, A_2, B_1, \neg B_2, \neg B_3\}$ | $\llbracket x_1 \in [1, 2] \rrbracket, \llbracket x_2 \in [0, 1] \rrbracket$ | $x_1^3 x_2$ | $\{A_1, A_2, \neg B_1, B_2, B_3\}$ | $\llbracket x_1 \in [0, 1] \rrbracket, \llbracket x_2 \in [2, 3] \rrbracket$ | $x_1 x_2^2$ | $\{A_1, A_2, \neg B_1, B_2, \neg B_3\}$ | $\llbracket x_1 \in [0, 1] \rrbracket, \llbracket x_2 \in [1, 2] \rrbracket$ | $x_1 x_2^3$ | $\{A_1, A_2, \neg B_1, \neg B_2, \neg B_3\}$ | $\llbracket x_1 \in [0, 1] \rrbracket, \llbracket x_2 \in [0, 1] \rrbracket$ | $x_1 x_2^3$ | $\{A_1, \neg A_2, B_1, B_2, B_3\}$ | $\llbracket x_1 \in [1, 2] \rrbracket, \llbracket x_2 \in [2, 3] \rrbracket$ | $x_1^2 x_2$ | $\vdots$ [same as with $\{A_1, A_2\}$ ] | $\vdots$ | $\vdots$ | $\{A_1, \neg A_2, \neg B_1, \neg B_2, \neg B_3\}$ | $\llbracket x_1 \in [0, 1] \rrbracket, \llbracket x_2 \in [0, 1] \rrbracket$ | $x_1 x_2^3$ | $\{\neg A_1, A_2, B_1, B_2, B_3\}$ | $\llbracket x_1 \in [1, 2] \rrbracket, \llbracket x_2 \in [2, 3] \rrbracket$ | $2x_1 x_2$ | $\{\neg A_1, A_2, B_1, B_2, \neg B_3\}$ | $\llbracket x_1 \in [1, 2] \rrbracket, \llbracket x_2 \in [1, 2] \rrbracket$ | $2x_1 x_2$ | $\{\neg A_1, A_2, B_1, \neg B_2, \neg B_3\}$ | $\llbracket x_1 \in [1, 2] \rrbracket, \llbracket x_2 \in [0, 1] \rrbracket$ | $2x_1 x_2$ | $\{\neg A_1, A_2, \neg B_1, B_2, B_3\}$ | $\llbracket x_1 \in [0, 1] \rrbracket, \llbracket x_2 \in [2, 3] \rrbracket$ | $2x_1 x_2$ | $\{\neg A_1, A_2, \neg B_1, B_2, \neg B_3\}$ | $\llbracket x_1 \in [0, 1] \rrbracket, \llbracket x_2 \in [1, 2] \rrbracket$ | $2x_1 x_2$ | $\{\neg A_1, A_2, \neg B_1, \neg B_2, \neg B_3\}$ | $\llbracket x_1 \in [0, 1] \rrbracket, \llbracket x_2 \in [0, 1] \rrbracket$ | $2x_1 x_2$ | $\{\neg A_1, \neg A_2, B_1, B_2, B_3\}$ | $\llbracket x_1 \in [1, 2] \rrbracket, \llbracket x_2 \in [2, 3] \rrbracket$ | $3x_1 x_2$ | $\vdots$ [same as with $\{\neg A_1, A_2\}$ ] | $\vdots$ | $\vdots$ | $\{\neg A_1, \neg A_2, \neg B_1, \neg B_2, \neg B_3\}$ | $\llbracket x_1 \in [0, 1] \rrbracket, \llbracket x_2 \in [0, 1] \rrbracket$ | $3x_1 x_2$ |
|-------------------------------------------------------------------------------------------------------------------------------------------------------------------------|---------------------------------------------------------------------------------------------------------------------------------------------------------------------------------------------------------------------------------------------|-----------------------------------------------------------------------------------------------------------------------------------------------------------------------------------------------------------------------------------------------------------------------------------------------------------------------------------------------------------------------------------------------------------------------------------------------------------------------------------------------------------------------------------------------------------------------------------------------------------------------------------------------------------------------------------------------------------------------------------------------------------------------------------------------------------------------------------------------------------------------------------------------------------------------------------------------------------------------------------------------------------------------------------------------------------------------------------------------------------------------------------------------------------------------------------------------------------------------------------------------------------------------------------------------------------------------------------------------------------------------------------------------------------------------------------------------------------------------------------------------------------------------------------------------------------------------------------------------------------------------------------------------------------------------------------------------------------------------------------------------------------------------------------------------------------------------------------------------------------------------------------------------------------------------------------------------------------------------------------------------------------------------------------------------------------------------------------------------------------------------------------------------------------------------------------------------------------------------------------------------------------------------------------------------------------------------------------------------------------------------------------------------------------------------------------------------------------------------------------------------------------------------------------------------------------------------------------------------------------------------------------------------------------------------------------------------------------------------------------------------------------------------------------------------------------------------------------------------------------------------------------------------------------------------------------------------------------------------------------------------------------------------------------------------------------------------------------------------------------------------------------------------------------------------------------------------------------------------------------------------------------------------------------------------------------------------------------------------------------------------------------------------------------------------------------------------------------------------------------------------------------------------------------------------------------------------------------------------------------------------------------------------------------------------------------------------------------------------------------|------------|-------|-----|-------------------------------|------------------------------------------------------------------------------|-------------|------------------------------------|------------------------------------------------------------------------------|-------------|-----------------------------------------|------------------------------------------------------------------------------|-------------|------------------------------------|------------------------------------------------------------------------------|-------------|-----------------------------------------|------------------------------------------------------------------------------|-------------|----------------------------------------------|------------------------------------------------------------------------------|-------------|------------------------------------|------------------------------------------------------------------------------|-------------|-----------------------------------------|----------|----------|---------------------------------------------------|------------------------------------------------------------------------------|-------------|------------------------------------|------------------------------------------------------------------------------|------------|-----------------------------------------|------------------------------------------------------------------------------|------------|----------------------------------------------|------------------------------------------------------------------------------|------------|-----------------------------------------|------------------------------------------------------------------------------|------------|----------------------------------------------|------------------------------------------------------------------------------|------------|---------------------------------------------------|------------------------------------------------------------------------------|------------|-----------------------------------------|------------------------------------------------------------------------------|------------|----------------------------------------------|----------|----------|--------------------------------------------------------|------------------------------------------------------------------------------|------------|
| Assignment                                                                                                                                                              | Range                                                                                                                                                                                                                                       | $w$                                                                                                                                                                                                                                                                                                                                                                                                                                                                                                                                                                                                                                                                                                                                                                                                                                                                                                                                                                                                                                                                                                                                                                                                                                                                                                                                                                                                                                                                                                                                                                                                                                                                                                                                                                                                                                                                                                                                                                                                                                                                                                                                                                                                                                                                                                                                                                                                                                                                                                                                                                                                                                                                                                                                                                                                                                                                                                                                                                                                                                                                                                                                                                                                                                                                                                                                                                                                                                                                                                                                                                                                                                                                                                                               |            |       |     |                               |                                                                              |             |                                    |                                                                              |             |                                         |                                                                              |             |                                    |                                                                              |             |                                         |                                                                              |             |                                              |                                                                              |             |                                    |                                                                              |             |                                         |          |          |                                                   |                                                                              |             |                                    |                                                                              |            |                                         |                                                                              |            |                                              |                                                                              |            |                                         |                                                                              |            |                                              |                                                                              |            |                                                   |                                                                              |            |                                         |                                                                              |            |                                              |          |          |                                                        |                                                                              |            |
| $\{A_1, A_2, B_1, B_2, B_3\}$                                                                                                                                           | $\llbracket x_1 \in [1, 2] \rrbracket, \llbracket x_2 \in [2, 3] \rrbracket$                                                                                                                                                                | $x_1^2 x_2$                                                                                                                                                                                                                                                                                                                                                                                                                                                                                                                                                                                                                                                                                                                                                                                                                                                                                                                                                                                                                                                                                                                                                                                                                                                                                                                                                                                                                                                                                                                                                                                                                                                                                                                                                                                                                                                                                                                                                                                                                                                                                                                                                                                                                                                                                                                                                                                                                                                                                                                                                                                                                                                                                                                                                                                                                                                                                                                                                                                                                                                                                                                                                                                                                                                                                                                                                                                                                                                                                                                                                                                                                                                                                                                       |            |       |     |                               |                                                                              |             |                                    |                                                                              |             |                                         |                                                                              |             |                                    |                                                                              |             |                                         |                                                                              |             |                                              |                                                                              |             |                                    |                                                                              |             |                                         |          |          |                                                   |                                                                              |             |                                    |                                                                              |            |                                         |                                                                              |            |                                              |                                                                              |            |                                         |                                                                              |            |                                              |                                                                              |            |                                                   |                                                                              |            |                                         |                                                                              |            |                                              |          |          |                                                        |                                                                              |            |
| $\{A_1, A_2, B_1, B_2, \neg B_3\}$                                                                                                                                      | $\llbracket x_1 \in [1, 2] \rrbracket, \llbracket x_2 \in [1, 2] \rrbracket$                                                                                                                                                                | $x_1^2 x_2$                                                                                                                                                                                                                                                                                                                                                                                                                                                                                                                                                                                                                                                                                                                                                                                                                                                                                                                                                                                                                                                                                                                                                                                                                                                                                                                                                                                                                                                                                                                                                                                                                                                                                                                                                                                                                                                                                                                                                                                                                                                                                                                                                                                                                                                                                                                                                                                                                                                                                                                                                                                                                                                                                                                                                                                                                                                                                                                                                                                                                                                                                                                                                                                                                                                                                                                                                                                                                                                                                                                                                                                                                                                                                                                       |            |       |     |                               |                                                                              |             |                                    |                                                                              |             |                                         |                                                                              |             |                                    |                                                                              |             |                                         |                                                                              |             |                                              |                                                                              |             |                                    |                                                                              |             |                                         |          |          |                                                   |                                                                              |             |                                    |                                                                              |            |                                         |                                                                              |            |                                              |                                                                              |            |                                         |                                                                              |            |                                              |                                                                              |            |                                                   |                                                                              |            |                                         |                                                                              |            |                                              |          |          |                                                        |                                                                              |            |
| $\{A_1, A_2, B_1, \neg B_2, \neg B_3\}$                                                                                                                                 | $\llbracket x_1 \in [1, 2] \rrbracket, \llbracket x_2 \in [0, 1] \rrbracket$                                                                                                                                                                | $x_1^3 x_2$                                                                                                                                                                                                                                                                                                                                                                                                                                                                                                                                                                                                                                                                                                                                                                                                                                                                                                                                                                                                                                                                                                                                                                                                                                                                                                                                                                                                                                                                                                                                                                                                                                                                                                                                                                                                                                                                                                                                                                                                                                                                                                                                                                                                                                                                                                                                                                                                                                                                                                                                                                                                                                                                                                                                                                                                                                                                                                                                                                                                                                                                                                                                                                                                                                                                                                                                                                                                                                                                                                                                                                                                                                                                                                                       |            |       |     |                               |                                                                              |             |                                    |                                                                              |             |                                         |                                                                              |             |                                    |                                                                              |             |                                         |                                                                              |             |                                              |                                                                              |             |                                    |                                                                              |             |                                         |          |          |                                                   |                                                                              |             |                                    |                                                                              |            |                                         |                                                                              |            |                                              |                                                                              |            |                                         |                                                                              |            |                                              |                                                                              |            |                                                   |                                                                              |            |                                         |                                                                              |            |                                              |          |          |                                                        |                                                                              |            |
| $\{A_1, A_2, \neg B_1, B_2, B_3\}$                                                                                                                                      | $\llbracket x_1 \in [0, 1] \rrbracket, \llbracket x_2 \in [2, 3] \rrbracket$                                                                                                                                                                | $x_1 x_2^2$                                                                                                                                                                                                                                                                                                                                                                                                                                                                                                                                                                                                                                                                                                                                                                                                                                                                                                                                                                                                                                                                                                                                                                                                                                                                                                                                                                                                                                                                                                                                                                                                                                                                                                                                                                                                                                                                                                                                                                                                                                                                                                                                                                                                                                                                                                                                                                                                                                                                                                                                                                                                                                                                                                                                                                                                                                                                                                                                                                                                                                                                                                                                                                                                                                                                                                                                                                                                                                                                                                                                                                                                                                                                                                                       |            |       |     |                               |                                                                              |             |                                    |                                                                              |             |                                         |                                                                              |             |                                    |                                                                              |             |                                         |                                                                              |             |                                              |                                                                              |             |                                    |                                                                              |             |                                         |          |          |                                                   |                                                                              |             |                                    |                                                                              |            |                                         |                                                                              |            |                                              |                                                                              |            |                                         |                                                                              |            |                                              |                                                                              |            |                                                   |                                                                              |            |                                         |                                                                              |            |                                              |          |          |                                                        |                                                                              |            |
| $\{A_1, A_2, \neg B_1, B_2, \neg B_3\}$                                                                                                                                 | $\llbracket x_1 \in [0, 1] \rrbracket, \llbracket x_2 \in [1, 2] \rrbracket$                                                                                                                                                                | $x_1 x_2^3$                                                                                                                                                                                                                                                                                                                                                                                                                                                                                                                                                                                                                                                                                                                                                                                                                                                                                                                                                                                                                                                                                                                                                                                                                                                                                                                                                                                                                                                                                                                                                                                                                                                                                                                                                                                                                                                                                                                                                                                                                                                                                                                                                                                                                                                                                                                                                                                                                                                                                                                                                                                                                                                                                                                                                                                                                                                                                                                                                                                                                                                                                                                                                                                                                                                                                                                                                                                                                                                                                                                                                                                                                                                                                                                       |            |       |     |                               |                                                                              |             |                                    |                                                                              |             |                                         |                                                                              |             |                                    |                                                                              |             |                                         |                                                                              |             |                                              |                                                                              |             |                                    |                                                                              |             |                                         |          |          |                                                   |                                                                              |             |                                    |                                                                              |            |                                         |                                                                              |            |                                              |                                                                              |            |                                         |                                                                              |            |                                              |                                                                              |            |                                                   |                                                                              |            |                                         |                                                                              |            |                                              |          |          |                                                        |                                                                              |            |
| $\{A_1, A_2, \neg B_1, \neg B_2, \neg B_3\}$                                                                                                                            | $\llbracket x_1 \in [0, 1] \rrbracket, \llbracket x_2 \in [0, 1] \rrbracket$                                                                                                                                                                | $x_1 x_2^3$                                                                                                                                                                                                                                                                                                                                                                                                                                                                                                                                                                                                                                                                                                                                                                                                                                                                                                                                                                                                                                                                                                                                                                                                                                                                                                                                                                                                                                                                                                                                                                                                                                                                                                                                                                                                                                                                                                                                                                                                                                                                                                                                                                                                                                                                                                                                                                                                                                                                                                                                                                                                                                                                                                                                                                                                                                                                                                                                                                                                                                                                                                                                                                                                                                                                                                                                                                                                                                                                                                                                                                                                                                                                                                                       |            |       |     |                               |                                                                              |             |                                    |                                                                              |             |                                         |                                                                              |             |                                    |                                                                              |             |                                         |                                                                              |             |                                              |                                                                              |             |                                    |                                                                              |             |                                         |          |          |                                                   |                                                                              |             |                                    |                                                                              |            |                                         |                                                                              |            |                                              |                                                                              |            |                                         |                                                                              |            |                                              |                                                                              |            |                                                   |                                                                              |            |                                         |                                                                              |            |                                              |          |          |                                                        |                                                                              |            |
| $\{A_1, \neg A_2, B_1, B_2, B_3\}$                                                                                                                                      | $\llbracket x_1 \in [1, 2] \rrbracket, \llbracket x_2 \in [2, 3] \rrbracket$                                                                                                                                                                | $x_1^2 x_2$                                                                                                                                                                                                                                                                                                                                                                                                                                                                                                                                                                                                                                                                                                                                                                                                                                                                                                                                                                                                                                                                                                                                                                                                                                                                                                                                                                                                                                                                                                                                                                                                                                                                                                                                                                                                                                                                                                                                                                                                                                                                                                                                                                                                                                                                                                                                                                                                                                                                                                                                                                                                                                                                                                                                                                                                                                                                                                                                                                                                                                                                                                                                                                                                                                                                                                                                                                                                                                                                                                                                                                                                                                                                                                                       |            |       |     |                               |                                                                              |             |                                    |                                                                              |             |                                         |                                                                              |             |                                    |                                                                              |             |                                         |                                                                              |             |                                              |                                                                              |             |                                    |                                                                              |             |                                         |          |          |                                                   |                                                                              |             |                                    |                                                                              |            |                                         |                                                                              |            |                                              |                                                                              |            |                                         |                                                                              |            |                                              |                                                                              |            |                                                   |                                                                              |            |                                         |                                                                              |            |                                              |          |          |                                                        |                                                                              |            |
| $\vdots$ [same as with $\{A_1, A_2\}$ ]                                                                                                                                 | $\vdots$                                                                                                                                                                                                                                    | $\vdots$                                                                                                                                                                                                                                                                                                                                                                                                                                                                                                                                                                                                                                                                                                                                                                                                                                                                                                                                                                                                                                                                                                                                                                                                                                                                                                                                                                                                                                                                                                                                                                                                                                                                                                                                                                                                                                                                                                                                                                                                                                                                                                                                                                                                                                                                                                                                                                                                                                                                                                                                                                                                                                                                                                                                                                                                                                                                                                                                                                                                                                                                                                                                                                                                                                                                                                                                                                                                                                                                                                                                                                                                                                                                                                                          |            |       |     |                               |                                                                              |             |                                    |                                                                              |             |                                         |                                                                              |             |                                    |                                                                              |             |                                         |                                                                              |             |                                              |                                                                              |             |                                    |                                                                              |             |                                         |          |          |                                                   |                                                                              |             |                                    |                                                                              |            |                                         |                                                                              |            |                                              |                                                                              |            |                                         |                                                                              |            |                                              |                                                                              |            |                                                   |                                                                              |            |                                         |                                                                              |            |                                              |          |          |                                                        |                                                                              |            |
| $\{A_1, \neg A_2, \neg B_1, \neg B_2, \neg B_3\}$                                                                                                                       | $\llbracket x_1 \in [0, 1] \rrbracket, \llbracket x_2 \in [0, 1] \rrbracket$                                                                                                                                                                | $x_1 x_2^3$                                                                                                                                                                                                                                                                                                                                                                                                                                                                                                                                                                                                                                                                                                                                                                                                                                                                                                                                                                                                                                                                                                                                                                                                                                                                                                                                                                                                                                                                                                                                                                                                                                                                                                                                                                                                                                                                                                                                                                                                                                                                                                                                                                                                                                                                                                                                                                                                                                                                                                                                                                                                                                                                                                                                                                                                                                                                                                                                                                                                                                                                                                                                                                                                                                                                                                                                                                                                                                                                                                                                                                                                                                                                                                                       |            |       |     |                               |                                                                              |             |                                    |                                                                              |             |                                         |                                                                              |             |                                    |                                                                              |             |                                         |                                                                              |             |                                              |                                                                              |             |                                    |                                                                              |             |                                         |          |          |                                                   |                                                                              |             |                                    |                                                                              |            |                                         |                                                                              |            |                                              |                                                                              |            |                                         |                                                                              |            |                                              |                                                                              |            |                                                   |                                                                              |            |                                         |                                                                              |            |                                              |          |          |                                                        |                                                                              |            |
| $\{\neg A_1, A_2, B_1, B_2, B_3\}$                                                                                                                                      | $\llbracket x_1 \in [1, 2] \rrbracket, \llbracket x_2 \in [2, 3] \rrbracket$                                                                                                                                                                | $2x_1 x_2$                                                                                                                                                                                                                                                                                                                                                                                                                                                                                                                                                                                                                                                                                                                                                                                                                                                                                                                                                                                                                                                                                                                                                                                                                                                                                                                                                                                                                                                                                                                                                                                                                                                                                                                                                                                                                                                                                                                                                                                                                                                                                                                                                                                                                                                                                                                                                                                                                                                                                                                                                                                                                                                                                                                                                                                                                                                                                                                                                                                                                                                                                                                                                                                                                                                                                                                                                                                                                                                                                                                                                                                                                                                                                                                        |            |       |     |                               |                                                                              |             |                                    |                                                                              |             |                                         |                                                                              |             |                                    |                                                                              |             |                                         |                                                                              |             |                                              |                                                                              |             |                                    |                                                                              |             |                                         |          |          |                                                   |                                                                              |             |                                    |                                                                              |            |                                         |                                                                              |            |                                              |                                                                              |            |                                         |                                                                              |            |                                              |                                                                              |            |                                                   |                                                                              |            |                                         |                                                                              |            |                                              |          |          |                                                        |                                                                              |            |
| $\{\neg A_1, A_2, B_1, B_2, \neg B_3\}$                                                                                                                                 | $\llbracket x_1 \in [1, 2] \rrbracket, \llbracket x_2 \in [1, 2] \rrbracket$                                                                                                                                                                | $2x_1 x_2$                                                                                                                                                                                                                                                                                                                                                                                                                                                                                                                                                                                                                                                                                                                                                                                                                                                                                                                                                                                                                                                                                                                                                                                                                                                                                                                                                                                                                                                                                                                                                                                                                                                                                                                                                                                                                                                                                                                                                                                                                                                                                                                                                                                                                                                                                                                                                                                                                                                                                                                                                                                                                                                                                                                                                                                                                                                                                                                                                                                                                                                                                                                                                                                                                                                                                                                                                                                                                                                                                                                                                                                                                                                                                                                        |            |       |     |                               |                                                                              |             |                                    |                                                                              |             |                                         |                                                                              |             |                                    |                                                                              |             |                                         |                                                                              |             |                                              |                                                                              |             |                                    |                                                                              |             |                                         |          |          |                                                   |                                                                              |             |                                    |                                                                              |            |                                         |                                                                              |            |                                              |                                                                              |            |                                         |                                                                              |            |                                              |                                                                              |            |                                                   |                                                                              |            |                                         |                                                                              |            |                                              |          |          |                                                        |                                                                              |            |
| $\{\neg A_1, A_2, B_1, \neg B_2, \neg B_3\}$                                                                                                                            | $\llbracket x_1 \in [1, 2] \rrbracket, \llbracket x_2 \in [0, 1] \rrbracket$                                                                                                                                                                | $2x_1 x_2$                                                                                                                                                                                                                                                                                                                                                                                                                                                                                                                                                                                                                                                                                                                                                                                                                                                                                                                                                                                                                                                                                                                                                                                                                                                                                                                                                                                                                                                                                                                                                                                                                                                                                                                                                                                                                                                                                                                                                                                                                                                                                                                                                                                                                                                                                                                                                                                                                                                                                                                                                                                                                                                                                                                                                                                                                                                                                                                                                                                                                                                                                                                                                                                                                                                                                                                                                                                                                                                                                                                                                                                                                                                                                                                        |            |       |     |                               |                                                                              |             |                                    |                                                                              |             |                                         |                                                                              |             |                                    |                                                                              |             |                                         |                                                                              |             |                                              |                                                                              |             |                                    |                                                                              |             |                                         |          |          |                                                   |                                                                              |             |                                    |                                                                              |            |                                         |                                                                              |            |                                              |                                                                              |            |                                         |                                                                              |            |                                              |                                                                              |            |                                                   |                                                                              |            |                                         |                                                                              |            |                                              |          |          |                                                        |                                                                              |            |
| $\{\neg A_1, A_2, \neg B_1, B_2, B_3\}$                                                                                                                                 | $\llbracket x_1 \in [0, 1] \rrbracket, \llbracket x_2 \in [2, 3] \rrbracket$                                                                                                                                                                | $2x_1 x_2$                                                                                                                                                                                                                                                                                                                                                                                                                                                                                                                                                                                                                                                                                                                                                                                                                                                                                                                                                                                                                                                                                                                                                                                                                                                                                                                                                                                                                                                                                                                                                                                                                                                                                                                                                                                                                                                                                                                                                                                                                                                                                                                                                                                                                                                                                                                                                                                                                                                                                                                                                                                                                                                                                                                                                                                                                                                                                                                                                                                                                                                                                                                                                                                                                                                                                                                                                                                                                                                                                                                                                                                                                                                                                                                        |            |       |     |                               |                                                                              |             |                                    |                                                                              |             |                                         |                                                                              |             |                                    |                                                                              |             |                                         |                                                                              |             |                                              |                                                                              |             |                                    |                                                                              |             |                                         |          |          |                                                   |                                                                              |             |                                    |                                                                              |            |                                         |                                                                              |            |                                              |                                                                              |            |                                         |                                                                              |            |                                              |                                                                              |            |                                                   |                                                                              |            |                                         |                                                                              |            |                                              |          |          |                                                        |                                                                              |            |
| $\{\neg A_1, A_2, \neg B_1, B_2, \neg B_3\}$                                                                                                                            | $\llbracket x_1 \in [0, 1] \rrbracket, \llbracket x_2 \in [1, 2] \rrbracket$                                                                                                                                                                | $2x_1 x_2$                                                                                                                                                                                                                                                                                                                                                                                                                                                                                                                                                                                                                                                                                                                                                                                                                                                                                                                                                                                                                                                                                                                                                                                                                                                                                                                                                                                                                                                                                                                                                                                                                                                                                                                                                                                                                                                                                                                                                                                                                                                                                                                                                                                                                                                                                                                                                                                                                                                                                                                                                                                                                                                                                                                                                                                                                                                                                                                                                                                                                                                                                                                                                                                                                                                                                                                                                                                                                                                                                                                                                                                                                                                                                                                        |            |       |     |                               |                                                                              |             |                                    |                                                                              |             |                                         |                                                                              |             |                                    |                                                                              |             |                                         |                                                                              |             |                                              |                                                                              |             |                                    |                                                                              |             |                                         |          |          |                                                   |                                                                              |             |                                    |                                                                              |            |                                         |                                                                              |            |                                              |                                                                              |            |                                         |                                                                              |            |                                              |                                                                              |            |                                                   |                                                                              |            |                                         |                                                                              |            |                                              |          |          |                                                        |                                                                              |            |
| $\{\neg A_1, A_2, \neg B_1, \neg B_2, \neg B_3\}$                                                                                                                       | $\llbracket x_1 \in [0, 1] \rrbracket, \llbracket x_2 \in [0, 1] \rrbracket$                                                                                                                                                                | $2x_1 x_2$                                                                                                                                                                                                                                                                                                                                                                                                                                                                                                                                                                                                                                                                                                                                                                                                                                                                                                                                                                                                                                                                                                                                                                                                                                                                                                                                                                                                                                                                                                                                                                                                                                                                                                                                                                                                                                                                                                                                                                                                                                                                                                                                                                                                                                                                                                                                                                                                                                                                                                                                                                                                                                                                                                                                                                                                                                                                                                                                                                                                                                                                                                                                                                                                                                                                                                                                                                                                                                                                                                                                                                                                                                                                                                                        |            |       |     |                               |                                                                              |             |                                    |                                                                              |             |                                         |                                                                              |             |                                    |                                                                              |             |                                         |                                                                              |             |                                              |                                                                              |             |                                    |                                                                              |             |                                         |          |          |                                                   |                                                                              |             |                                    |                                                                              |            |                                         |                                                                              |            |                                              |                                                                              |            |                                         |                                                                              |            |                                              |                                                                              |            |                                                   |                                                                              |            |                                         |                                                                              |            |                                              |          |          |                                                        |                                                                              |            |
| $\{\neg A_1, \neg A_2, B_1, B_2, B_3\}$                                                                                                                                 | $\llbracket x_1 \in [1, 2] \rrbracket, \llbracket x_2 \in [2, 3] \rrbracket$                                                                                                                                                                | $3x_1 x_2$                                                                                                                                                                                                                                                                                                                                                                                                                                                                                                                                                                                                                                                                                                                                                                                                                                                                                                                                                                                                                                                                                                                                                                                                                                                                                                                                                                                                                                                                                                                                                                                                                                                                                                                                                                                                                                                                                                                                                                                                                                                                                                                                                                                                                                                                                                                                                                                                                                                                                                                                                                                                                                                                                                                                                                                                                                                                                                                                                                                                                                                                                                                                                                                                                                                                                                                                                                                                                                                                                                                                                                                                                                                                                                                        |            |       |     |                               |                                                                              |             |                                    |                                                                              |             |                                         |                                                                              |             |                                    |                                                                              |             |                                         |                                                                              |             |                                              |                                                                              |             |                                    |                                                                              |             |                                         |          |          |                                                   |                                                                              |             |                                    |                                                                              |            |                                         |                                                                              |            |                                              |                                                                              |            |                                         |                                                                              |            |                                              |                                                                              |            |                                                   |                                                                              |            |                                         |                                                                              |            |                                              |          |          |                                                        |                                                                              |            |
| $\vdots$ [same as with $\{\neg A_1, A_2\}$ ]                                                                                                                            | $\vdots$                                                                                                                                                                                                                                    | $\vdots$                                                                                                                                                                                                                                                                                                                                                                                                                                                                                                                                                                                                                                                                                                                                                                                                                                                                                                                                                                                                                                                                                                                                                                                                                                                                                                                                                                                                                                                                                                                                                                                                                                                                                                                                                                                                                                                                                                                                                                                                                                                                                                                                                                                                                                                                                                                                                                                                                                                                                                                                                                                                                                                                                                                                                                                                                                                                                                                                                                                                                                                                                                                                                                                                                                                                                                                                                                                                                                                                                                                                                                                                                                                                                                                          |            |       |     |                               |                                                                              |             |                                    |                                                                              |             |                                         |                                                                              |             |                                    |                                                                              |             |                                         |                                                                              |             |                                              |                                                                              |             |                                    |                                                                              |             |                                         |          |          |                                                   |                                                                              |             |                                    |                                                                              |            |                                         |                                                                              |            |                                              |                                                                              |            |                                         |                                                                              |            |                                              |                                                                              |            |                                                   |                                                                              |            |                                         |                                                                              |            |                                              |          |          |                                                        |                                                                              |            |
| $\{\neg A_1, \neg A_2, \neg B_1, \neg B_2, \neg B_3\}$                                                                                                                  | $\llbracket x_1 \in [0, 1] \rrbracket, \llbracket x_2 \in [0, 1] \rrbracket$                                                                                                                                                                | $3x_1 x_2$                                                                                                                                                                                                                                                                                                                                                                                                                                                                                                                                                                                                                                                                                                                                                                                                                                                                                                                                                                                                                                                                                                                                                                                                                                                                                                                                                                                                                                                                                                                                                                                                                                                                                                                                                                                                                                                                                                                                                                                                                                                                                                                                                                                                                                                                                                                                                                                                                                                                                                                                                                                                                                                                                                                                                                                                                                                                                                                                                                                                                                                                                                                                                                                                                                                                                                                                                                                                                                                                                                                                                                                                                                                                                                                        |            |       |     |                               |                                                                              |             |                                    |                                                                              |             |                                         |                                                                              |             |                                    |                                                                              |             |                                         |                                                                              |             |                                              |                                                                              |             |                                    |                                                                              |             |                                         |          |          |                                                   |                                                                              |             |                                    |                                                                              |            |                                         |                                                                              |            |                                              |                                                                              |            |                                         |                                                                              |            |                                              |                                                                              |            |                                                   |                                                                              |            |                                         |                                                                              |            |                                              |          |          |                                                        |                                                                              |            |
| <p><b>b</b></p> <p style="text-align: right;"><math>w(\mathbf{x}, \mathbf{A})</math></p>                                                                                | <p><b>d</b></p> <p style="text-align: right;"><math>w^*(\mathbf{x}, \mathbf{A} \cup \mathbf{B})</math></p>                                                                                                                                  |                                                                                                                                                                                                                                                                                                                                                                                                                                                                                                                                                                                                                                                                                                                                                                                                                                                                                                                                                                                                                                                                                                                                                                                                                                                                                                                                                                                                                                                                                                                                                                                                                                                                                                                                                                                                                                                                                                                                                                                                                                                                                                                                                                                                                                                                                                                                                                                                                                                                                                                                                                                                                                                                                                                                                                                                                                                                                                                                                                                                                                                                                                                                                                                                                                                                                                                                                                                                                                                                                                                                                                                                                                                                                                                                   |            |       |     |                               |                                                                              |             |                                    |                                                                              |             |                                         |                                                                              |             |                                    |                                                                              |             |                                         |                                                                              |             |                                              |                                                                              |             |                                    |                                                                              |             |                                         |          |          |                                                   |                                                                              |             |                                    |                                                                              |            |                                         |                                                                              |            |                                              |                                                                              |            |                                         |                                                                              |            |                                              |                                                                              |            |                                                   |                                                                              |            |                                         |                                                                              |            |                                              |          |          |                                                        |                                                                              |            |
