# Supplementary material
Source: ML conference proceedings conference paper supplement (https://openreview.net/forum?id=HYWMtDLo5g5)
Supplement: supplementary_material [file attachment]

# SMT-based Weighted Model Integration with Structure Awareness (Supplementary material)

Giuseppe Spallitta<sup>1</sup>   Gabriele Masina<sup>1</sup>   Paolo Morettin<sup>2</sup>   Andrea Passerini<sup>1</sup>   Roberto Sebastiani<sup>1</sup>

<sup>1</sup>University of Trento  
<sup>2</sup>KU Leuven

## $\llbracket y = w \rrbracket_{\mathcal{EUF}}$ DEFINITION

Algorithm 1 is such that, given a FIUC<sup>LR,A</sup> weight function  $w$  on conditions  $\Psi$ ,  $\text{Convert}(w, \emptyset)$  returns  $\langle w', \text{defs}, \mathbf{y} \rangle$  s.t.  $\llbracket y = w \rrbracket_{\mathcal{EUF}} \stackrel{\text{def}}{=} (y = w') \wedge \bigwedge_{\varphi_i \in \text{defs}} \varphi_i$ , on variables  $\mathbf{x} \cup \mathbf{y}, \mathbf{A}$ .

### Algorithm 1 $\text{Convert}(w, \text{conds})$

returns  $\langle w', \text{defs}, \mathbf{y} \rangle$   
 $w'$ : the term  $w$  is rewritten into  
 $\text{conds}$ : the current partial assignment to conditions  $\Psi$ , representing the set of conditions which  $w$  depends on  
 $\text{defs}$ : a set of definitions in the form  $y_i = w_i$  needed to rewrite  $w$  into  $w'$   
 $\mathbf{y}$ : newly-introduced variables labeling if-then-else terms  
 $f^g$ : uninterpreted function naming the function/operator  $g$

- 1: **if** ( $\{w$  constant or variable $\}$ ) **then**
- 2:     **return**  $\langle w, \emptyset, \emptyset \rangle$
- 3: **if** ( $w == (w_1 \bowtie w_2), \bowtie \in \{+, -, \cdot, /\}$ ) **then**
- 4:      $\langle w'_i, \text{defs}_i, \mathbf{y}_i \rangle = \text{Convert}(w_i, \text{conds}), i \in \{1, 2\}$
- 5:     **return**  $\langle f^{\bowtie}(w'_1, w'_2), \text{defs}_1 \cup \text{defs}_2, \mathbf{y}_1 \cup \mathbf{y}_2 \rangle$
- 6: **if** ( $w == g(w_1, \dots, w_k), g$  unconditioned) **then**
- 7:      $\langle w'_i, \text{defs}_i, \mathbf{y}_i \rangle = \text{Convert}(w_i, \text{conds}), i \in 1, \dots, k$
- 8:     **return**  $\langle f^g(w'_1, \dots, w'_k), \bigcup_{i=1}^k \text{defs}_i, \bigcup_{i=1}^k \mathbf{y}_i \rangle$
- 9: **if** ( $w == (\text{If } \psi \text{ Then } w_1 \text{ Else } w_2)$ ) **then**
- 10:      $\langle w'_1, \text{defs}_1, \mathbf{y}_1 \rangle = \text{Convert}(w_1, \text{conds} \cup \{ \psi \})$
- 11:      $\langle w'_2, \text{defs}_2, \mathbf{y}_2 \rangle = \text{Convert}(w_2, \text{conds} \cup \{ \neg \psi \})$
- 12:     **let**  $y$  be a fresh variable
- 13:      $\text{defs} = \text{defs}_1 \cup \text{defs}_2 \cup$
- 14:          $(\bigvee_{\psi_i \in \text{conds}} \neg \psi_i \vee \neg \psi \vee (y = w'_1) \cup$
- 15:          $(\bigvee_{\psi_i \in \text{conds}} \neg \psi_i \vee \psi \vee (y = w'_2) \cup$
- 16:          $(\bigvee_{\psi_i \in \text{conds}} \neg \psi_i \vee \neg(y = w'_1) \vee \neg(y = w'_2))$
- 17:      $\mathbf{y} = \mathbf{y}_1 \cup \mathbf{y}_2 \cup \{y\}$
- 18:     **return**  $\langle y, \text{defs}, \mathbf{y} \rangle$

| Dataset       | A  | x  | # Train | # Valid |
|---------------|----|----|---------|---------|
| balance-scale | 3  | 4  | 1875    | 205     |
| iris          | 3  | 4  | 450     | 50      |
| cars          | 33 | 7  | 2115    | 234     |
| diabetes      | 1  | 8  | 4149    | 459     |
| breast-cancer | 12 | 4  | 1650    | 180     |
| glass2        | 1  | 9  | 970     | 100     |
| glass         | 7  | 9  | 1280    | 140     |
| breast        | 1  | 10 | 4521    | 495     |
| solar         | 25 | 3  | 2522    | 273     |
| cleve         | 17 | 6  | 2492    | 266     |
| hepatitis     | 14 | 6  | 940     | 100     |
| heart         | 3  | 11 | 2268    | 252     |
| australian    | 34 | 6  | 6210    | 690     |
| crx           | 38 | 6  | 6688    | 736     |
| german        | 41 | 10 | 12600   | 1386    |
| german-org    | 13 | 12 | 15000   | 1650    |
| auto          | 56 | 16 | 2522    | 260     |
| anneal-U      | 74 | 9  | 21021   | 2301    |

Table 1: UCI datasets considered in our experiments. We report the number of Boolean and continuous variables, training and validation data size.
