# Supplementary material
Source: ML conference proceedings conference paper supplement (https://openreview.net/forum?id=HYWMtDLo5g5)
Supplement: supplementary_material [file attachment]

$$u(x, A)$$
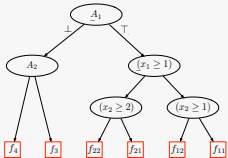
$$\begin{aligned} & (\neg A_1 \vee \neg(x_1 \geq 1) \vee \neg(x_2 \geq 1) \vee (y_1 = f_{11})) \\ & \wedge (\neg A_1 \vee \neg(x_1 \geq 1) \vee (x_2 \geq 1) \vee (y_1 = f_{12})) \\ & \wedge (\neg A_1 \vee \neg(x_1 \geq 1) \vee \neg(y_1 = f_{11}) \vee \neg(y_1 = f_{12})) \end{aligned}$$
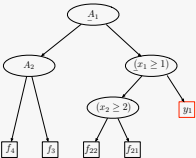
$$\begin{aligned} & (\neg A_1 \vee (x_1 \geq 1) \vee \neg(x_2 \geq 2) \vee (y_2 = f_{21})) \\ & \wedge (\neg A_1 \vee (x_1 \geq 1) \vee (x_2 \geq 2) \vee (y_2 = f_{22})) \\ & \wedge (\neg A_1 \vee (x_1 \geq 1) \vee \neg(y_2 = f_{21}) \vee \neg(y_2 = f_{22})) \end{aligned}$$
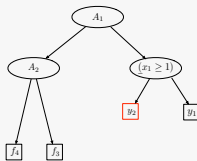
$$\begin{aligned} & (\neg A_1 \vee \neg(x_1 \geq 1) \vee (y_3 = y_1)) \\ & \wedge (\neg A_1 \vee (x_1 \geq 1) \vee (y_3 = y_2)) \\ & \wedge (\neg A_1 \vee \neg(y_3 = y_1) \vee \neg(y_3 = y_2)) \end{aligned}$$
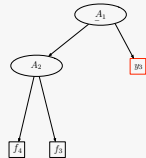
$$\begin{aligned} & (A_1 \vee \neg A_2 \vee (y_4 = f_3)) \\ & \wedge (A_1 \vee A_2 \vee (y_4 = f_4)) \\ & \wedge (A_1 \vee \neg(y_4 = f_3) \vee \neg(y_4 = f_4)) \end{aligned}$$
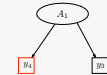
$$(\neg A_1 \vee (y_5 = y_3)) \wedge (A_1 \vee (y_5 = y_4)) \\ \wedge (\neg(y_5 = y_3) \vee \neg(y_5 = y_4))$$
$$(v = 0.5)$$
