# Supplementary material
Source: ML conference proceedings conference paper supplement (https://openreview.net/forum?id=HYWMtDLo5g5)
Supplement: supplementary_material [file attachment]

**a**

$$\varphi \stackrel{\text{def}}{=} \top, \chi \stackrel{\text{def}}{=} [x_1 \in [0, 2]] \wedge [x_2 \in [0, 3]]$$

**b**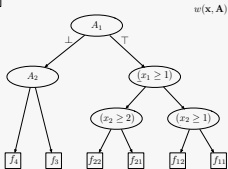**c**

$$\varphi^*(\mathbf{x}, \mathbf{A} \cup \mathbf{B}) \stackrel{\text{def}}{=} \varphi \wedge \chi \wedge B_1 \leftrightarrow (x_1 \geq 1) \wedge \\ B_2 \leftrightarrow (x_2 \geq 1) \wedge B_3 \leftrightarrow (x_2 \geq 2)$$

**d**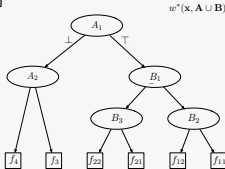**e**

| Assignment                                             | Range                                | w        |
|--------------------------------------------------------|--------------------------------------|----------|
| $\{A_1, A_2, B_1, B_2, B_3\}$                          | $[x_1 \in [1, 2]], [x_2 \in [2, 3]]$ | $f_{11}$ |
| $\{A_1, A_2, B_1, B_2, \neg B_3\}$                     | $[x_1 \in [1, 2]], [x_2 \in [1, 2]]$ | $f_{11}$ |
| $\{A_1, A_2, B_1, \neg B_2, \neg B_3\}$                | $[x_1 \in [1, 2]], [x_2 \in [0, 1]]$ | $f_{12}$ |
| $\{A_1, A_2, \neg B_1, B_2, B_3\}$                     | $[x_1 \in [0, 1]], [x_2 \in [2, 3]]$ | $f_{21}$ |
| $\{A_1, A_2, \neg B_1, B_2, \neg B_3\}$                | $[x_1 \in [0, 1]], [x_2 \in [1, 2]]$ | $f_{22}$ |
| $\{A_1, A_2, \neg B_1, \neg B_2, \neg B_3\}$           | $[x_1 \in [0, 1]], [x_2 \in [0, 1]]$ | $f_{22}$ |
| $\{A_1, \neg A_2, B_1, B_2, B_3\}$                     | $[x_1 \in [1, 2]], [x_2 \in [2, 3]]$ | $f_{11}$ |
| $\vdots$ [same as with $\{A_1, A_2\}$ ]                |                                      | $\vdots$ |
| $\{A_1, \neg A_2, \neg B_1, \neg B_2, \neg B_3\}$      | $[x_1 \in [0, 1]], [x_2 \in [0, 1]]$ | $f_{22}$ |
| $\{\neg A_1, A_2, B_1, B_2, B_3\}$                     | $[x_1 \in [1, 2]], [x_2 \in [2, 3]]$ | $f_3$    |
| $\{\neg A_1, A_2, B_1, B_2, \neg B_3\}$                | $[x_1 \in [1, 2]], [x_2 \in [1, 2]]$ | $f_3$    |
| $\{\neg A_1, A_2, B_1, \neg B_2, \neg B_3\}$           | $[x_1 \in [1, 2]], [x_2 \in [0, 1]]$ | $f_3$    |
| $\{\neg A_1, A_2, \neg B_1, B_2, B_3\}$                | $[x_1 \in [0, 1]], [x_2 \in [2, 3]]$ | $f_3$    |
| $\{\neg A_1, A_2, \neg B_1, B_2, \neg B_3\}$           | $[x_1 \in [0, 1]], [x_2 \in [1, 2]]$ | $f_3$    |
| $\{\neg A_1, A_2, \neg B_1, \neg B_2, \neg B_3\}$      | $[x_1 \in [0, 1]], [x_2 \in [0, 1]]$ | $f_3$    |
| $\{\neg A_1, \neg A_2, B_1, B_2, B_3\}$                | $[x_1 \in [1, 2]], [x_2 \in [2, 3]]$ | $f_4$    |
| $\vdots$ [same as with $\{\neg A_1, A_2\}$ ]           |                                      | $\vdots$ |
| $\{\neg A_1, \neg A_2, \neg B_1, \neg B_2, \neg B_3\}$ | $[x_1 \in [0, 1]], [x_2 \in [0, 1]]$ | $f_4$    |
