# Supplementary material
Source: ML conference proceedings conference paper supplement (https://openreview.net/forum?id=HYWMtDLo5g5)

**a**

$$w(\mathbf{x}, \mathbf{A}) \stackrel{\text{def}}{=} \prod_{i=1}^3 (\text{if } A_i \text{ then } w_{i1}(\mathbf{x}) \text{ else } w_{i2}(\mathbf{x}))$$

**c**

$$\begin{aligned} w_{\bar{A}_1, \bar{A}_2, \bar{A}_3}(\mathbf{x}) &= w_{12}(\mathbf{x})w_{22}(\mathbf{x})w_{32}(\mathbf{x}) \\ w_{\bar{A}_1, \bar{A}_2, A_3}(\mathbf{x}) &= w_{12}(\mathbf{x})w_{22}(\mathbf{x})w_{31}(\mathbf{x}) \\ w_{\bar{A}_1, A_2, \bar{A}_3}(\mathbf{x}) &= w_{12}(\mathbf{x})w_{21}(\mathbf{x})w_{32}(\mathbf{x}) \\ w_{\bar{A}_1, A_2, A_3}(\mathbf{x}) &= w_{12}(\mathbf{x})w_{21}(\mathbf{x})w_{31}(\mathbf{x}) \\ w_{A_1, \bar{A}_2, \bar{A}_3}(\mathbf{x}) &= w_{11}(\mathbf{x})w_{22}(\mathbf{x})w_{32}(\mathbf{x}) \\ w_{A_1, \bar{A}_2, A_3}(\mathbf{x}) &= w_{11}(\mathbf{x})w_{22}(\mathbf{x})w_{31}(\mathbf{x}) \\ w_{A_1, A_2, \bar{A}_3}(\mathbf{x}) &= w_{11}(\mathbf{x})w_{21}(\mathbf{x})w_{32}(\mathbf{x}) \\ w_{A_1, A_2, A_3}(\mathbf{x}) &= w_{11}(\mathbf{x})w_{21}(\mathbf{x})w_{31}(\mathbf{x}) \end{aligned}$$

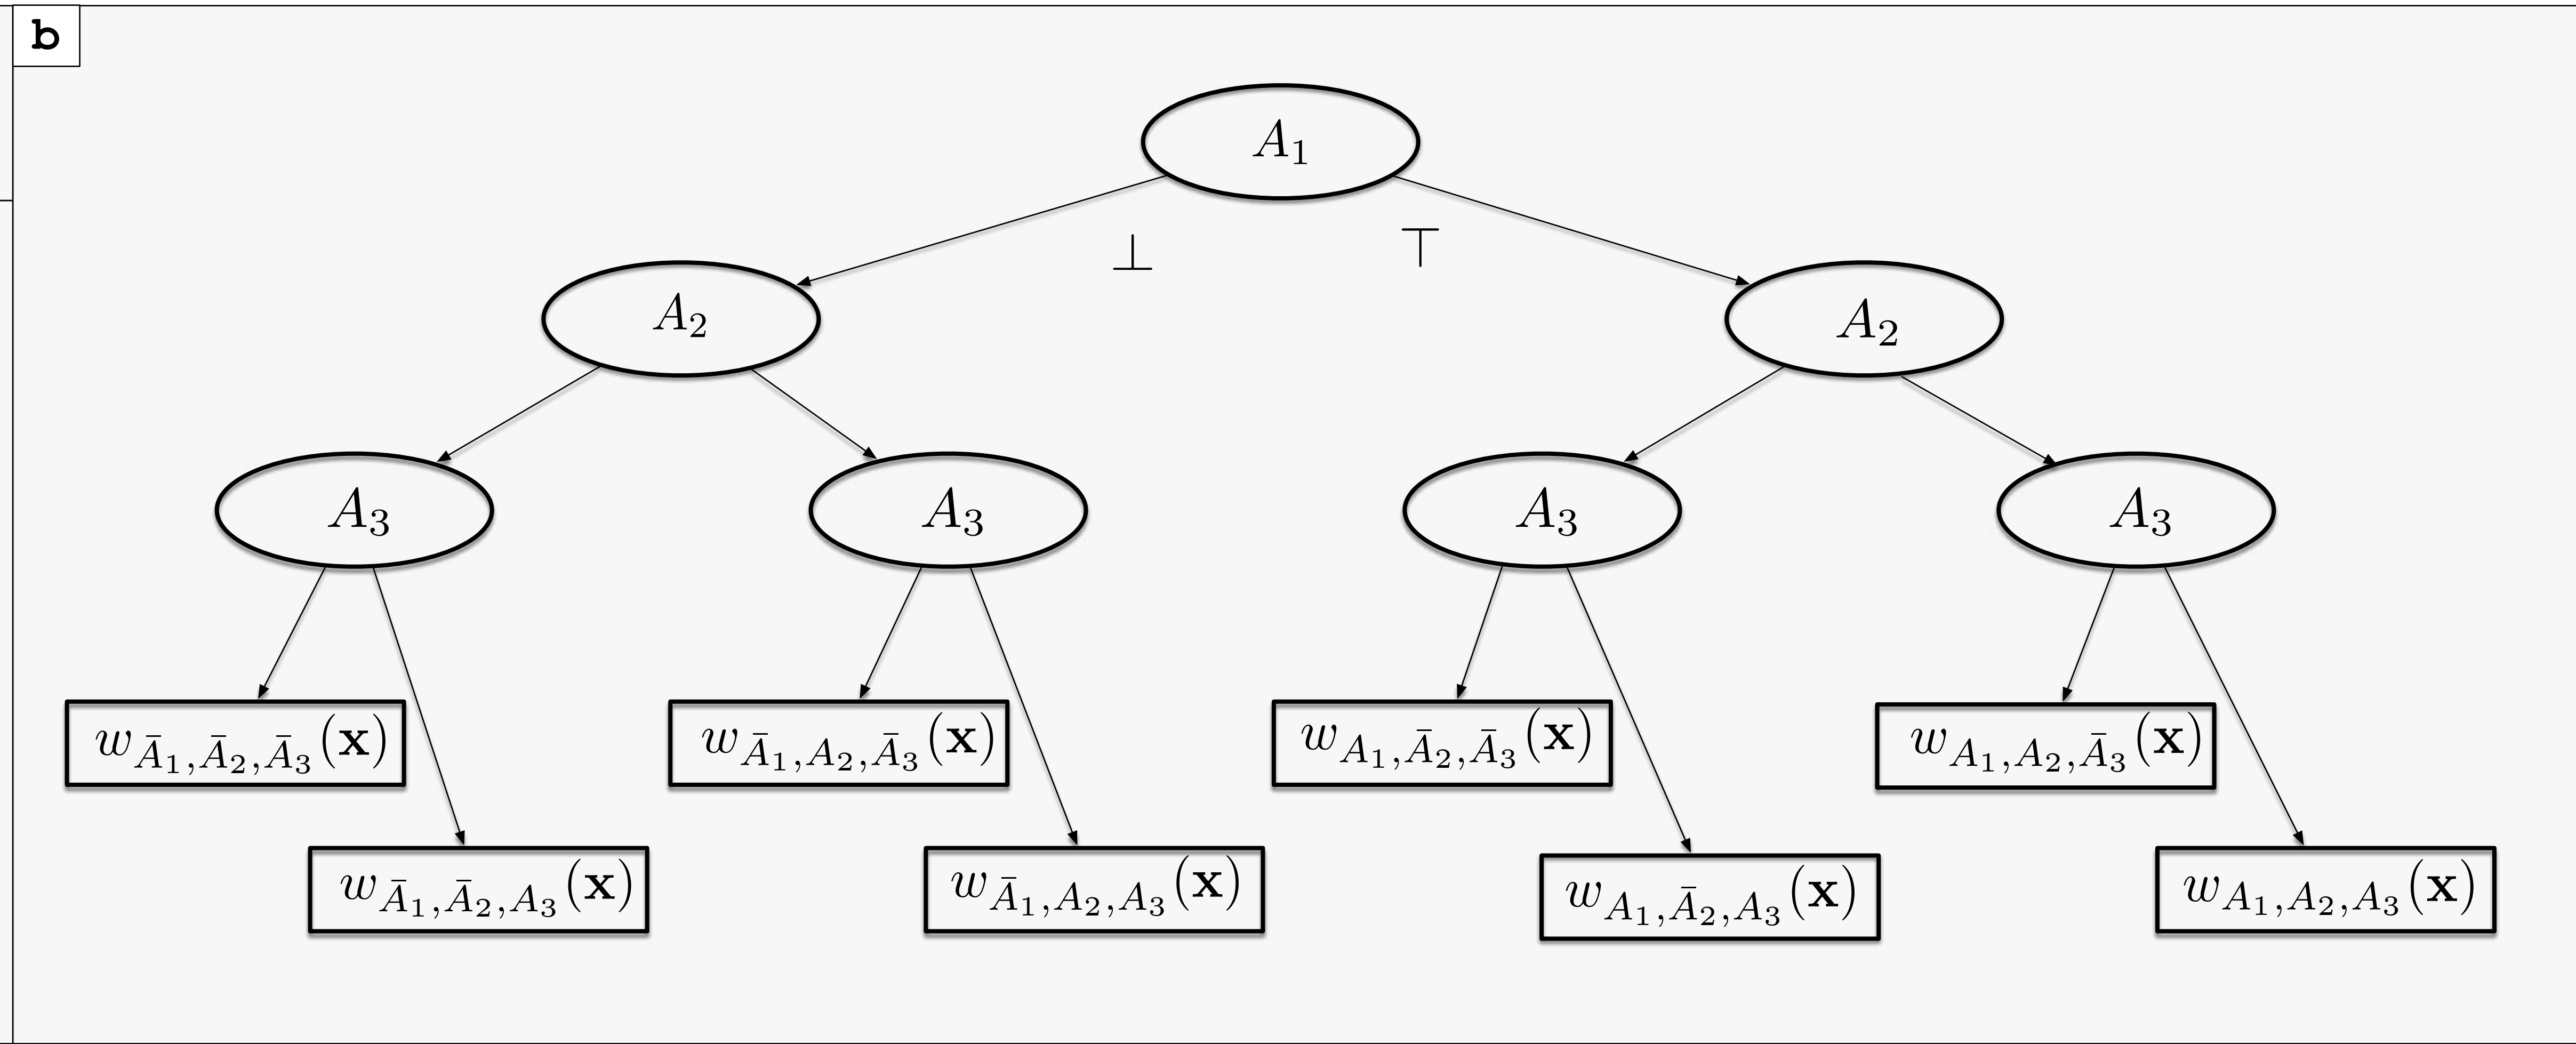

Supplement: supplementary_material [file attachment]
