# Supplementary material
Source: ML conference proceedings conference paper supplement (https://openreview.net/forum?id=HYWMtDLo5g5)

H=0.25

Query execution time (seconds)

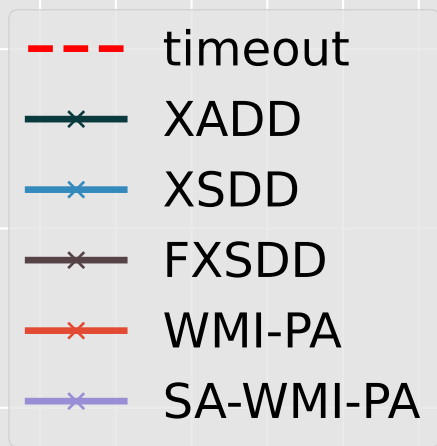

Problem instances

Supplement: supplementary_material [file attachment]

H=0.0

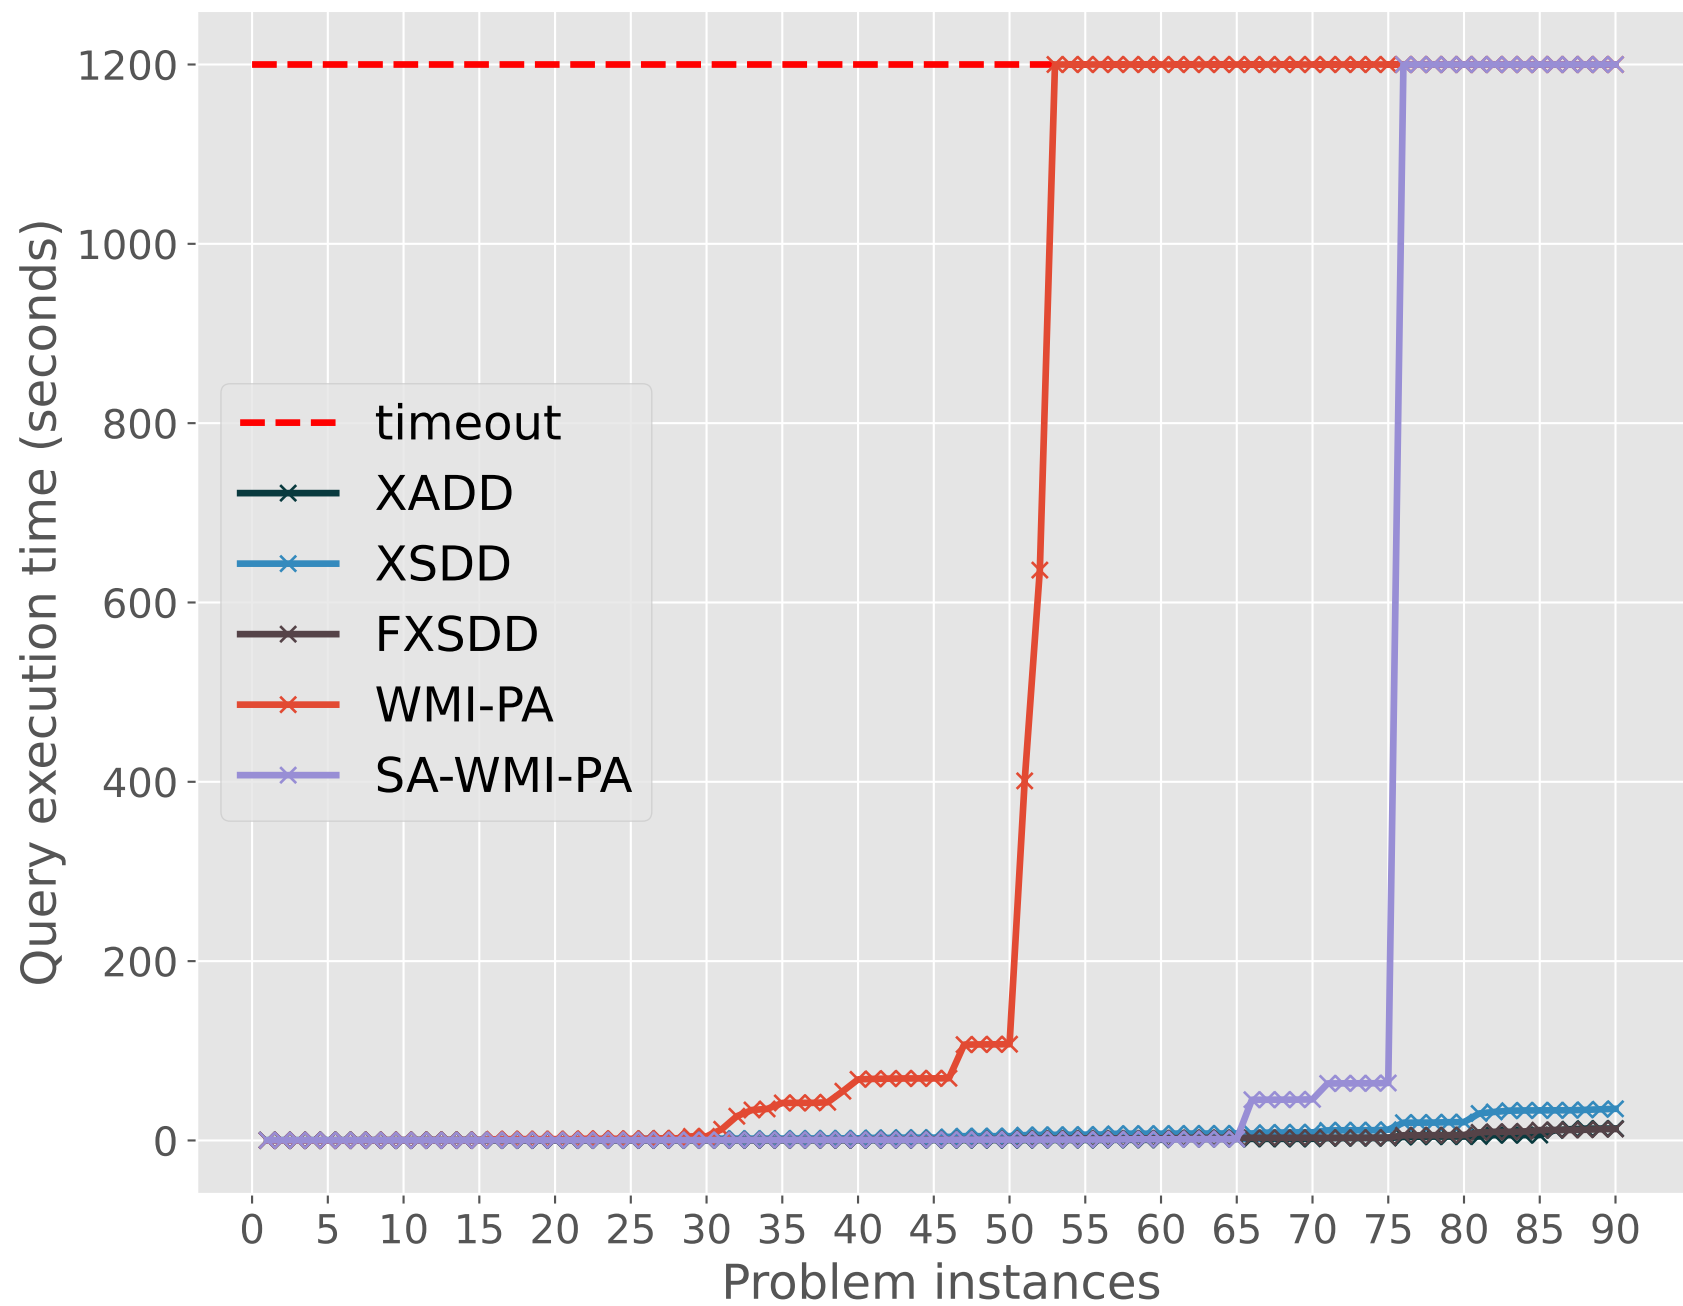

Supplement: supplementary_material [file attachment]

$H=1.0$

Query execution time (seconds)

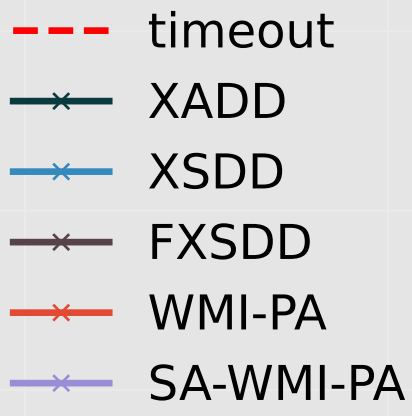

Number of problems solved

Supplement: supplementary_material [file attachment]

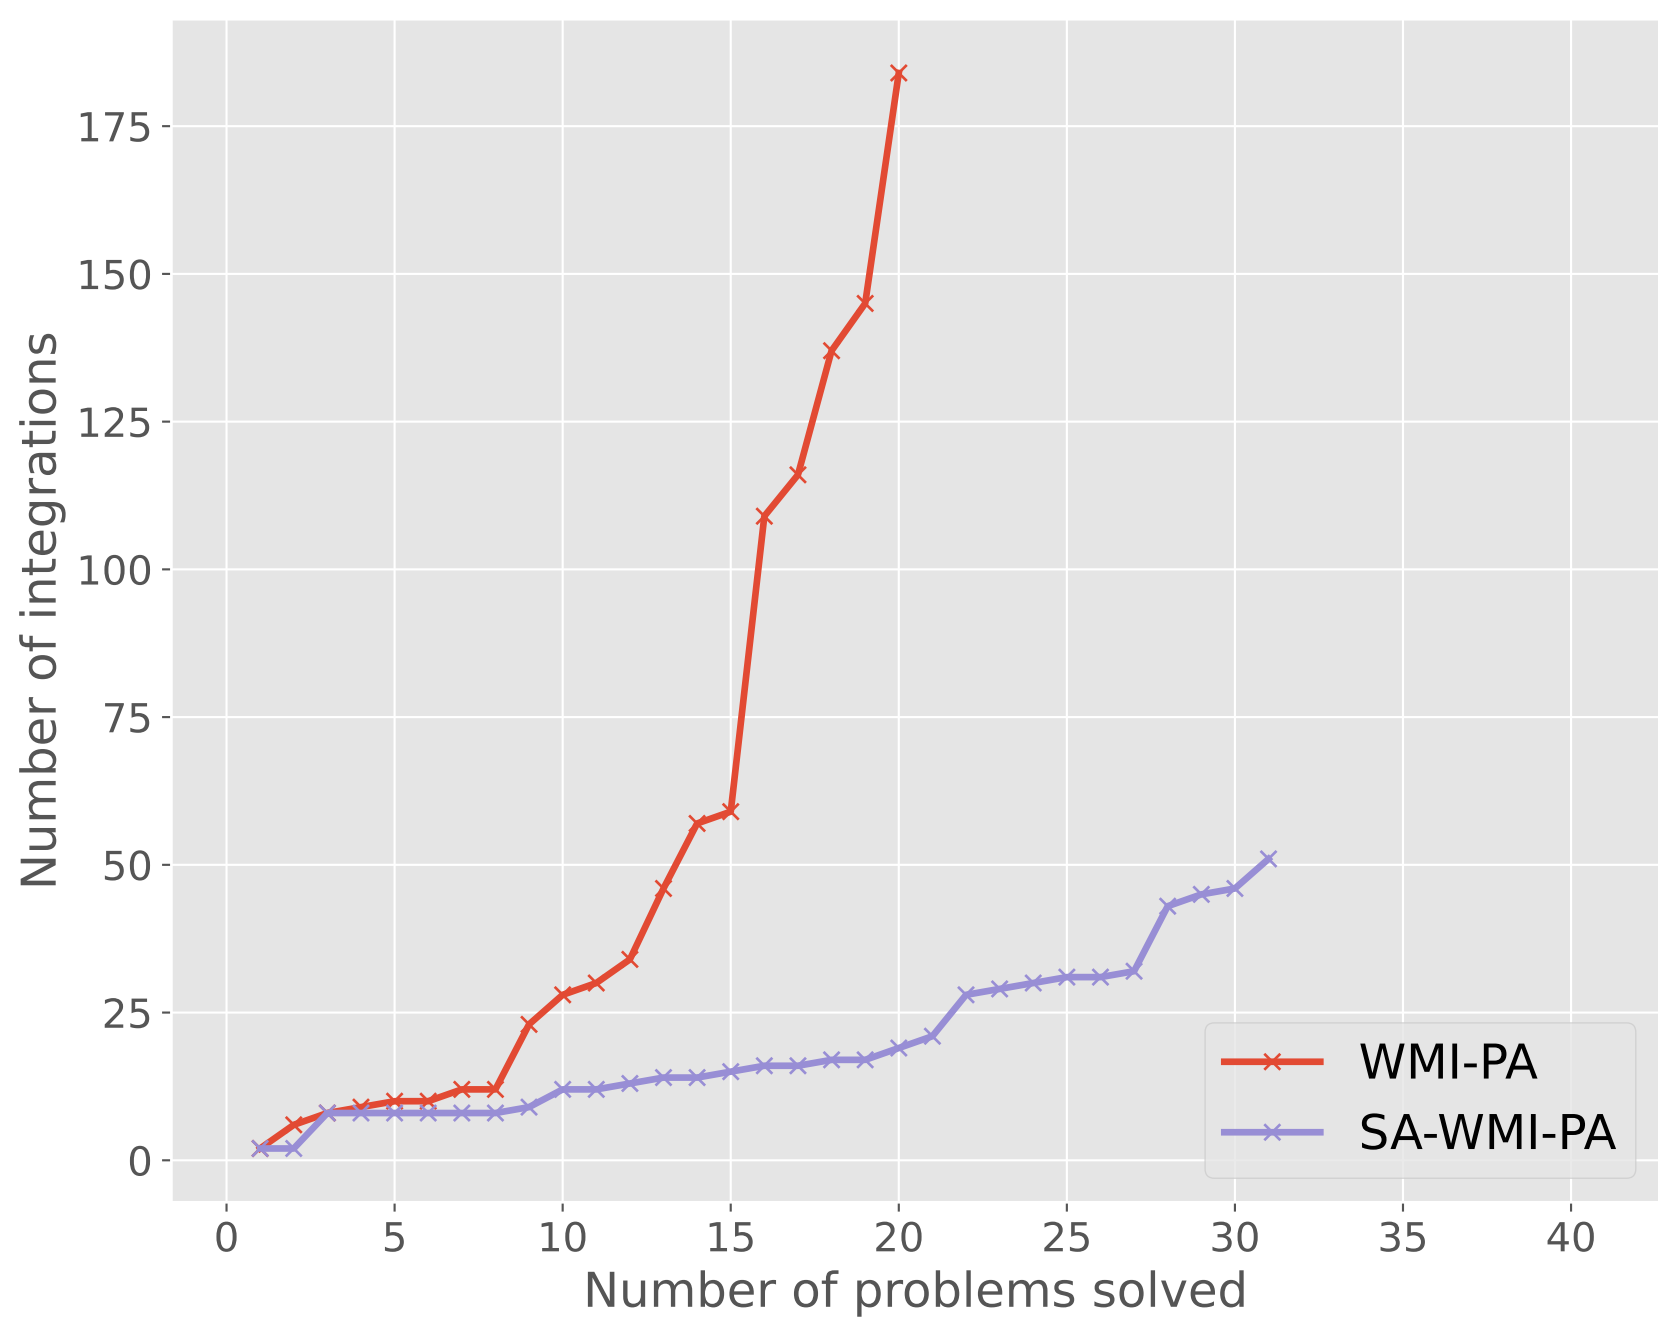

Supplement: supplementary_material [file attachment]

H=0.75

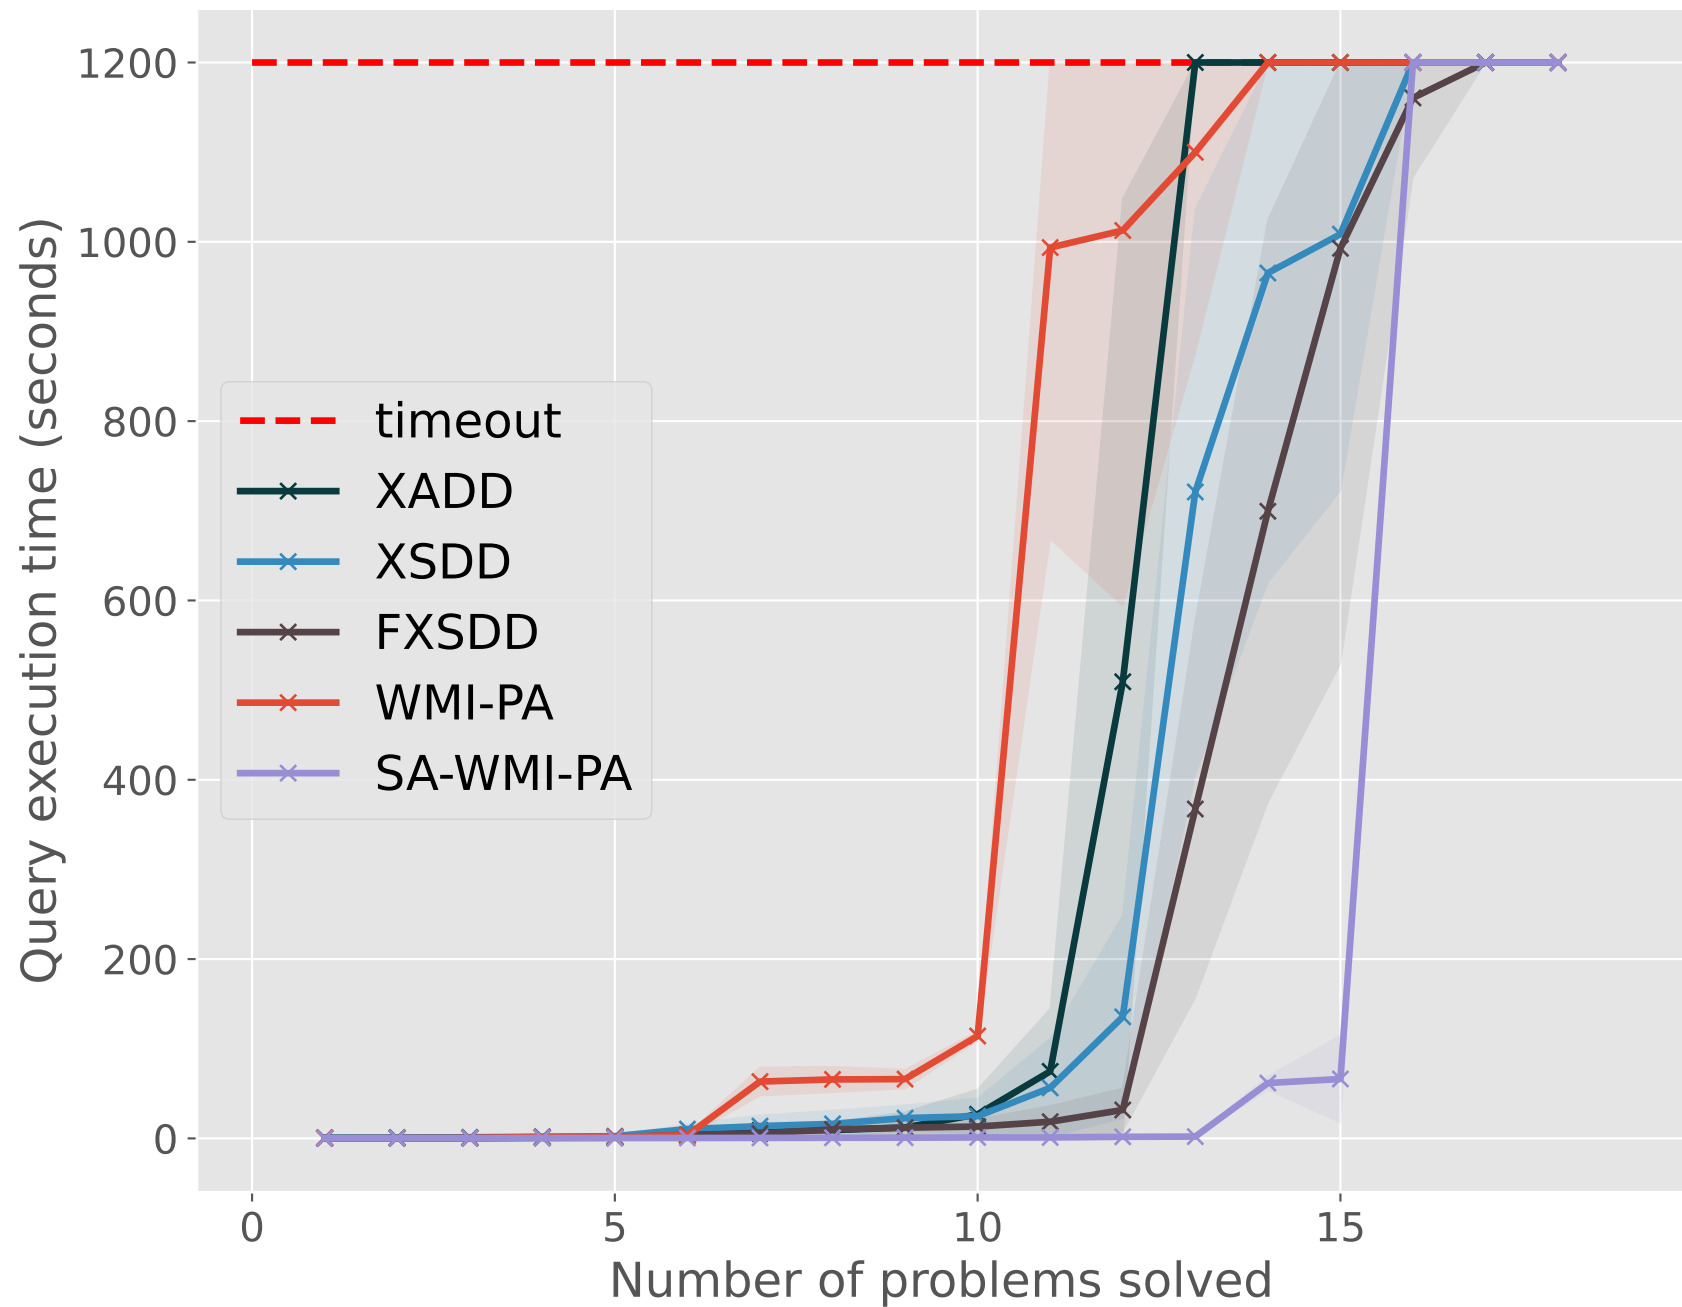

Supplement: supplementary_material [file attachment]

Query execution time (seconds)

0

5

10

15

20

25

30

35

40

Number of problems solved

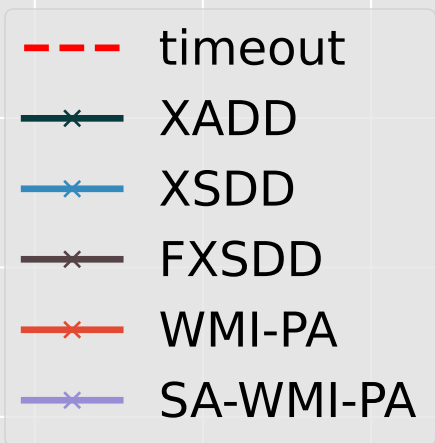

Supplement: supplementary_material [file attachment]

H=0.75

Query execution time (seconds)

1200  
1000  
800  
600  
400  
200  
0

0 5 10 15 20 25 30 35 40 45 50 55 60 65 70 75 80 85 90

Problem instances

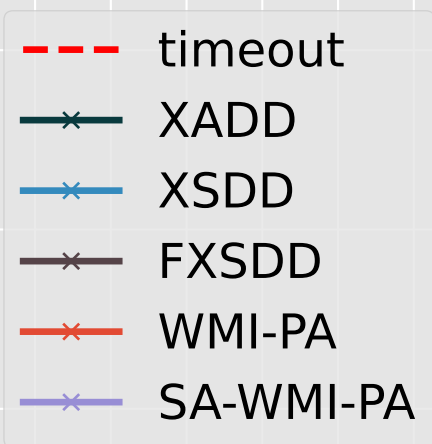

Supplement: supplementary_material [file attachment]

H=0.5

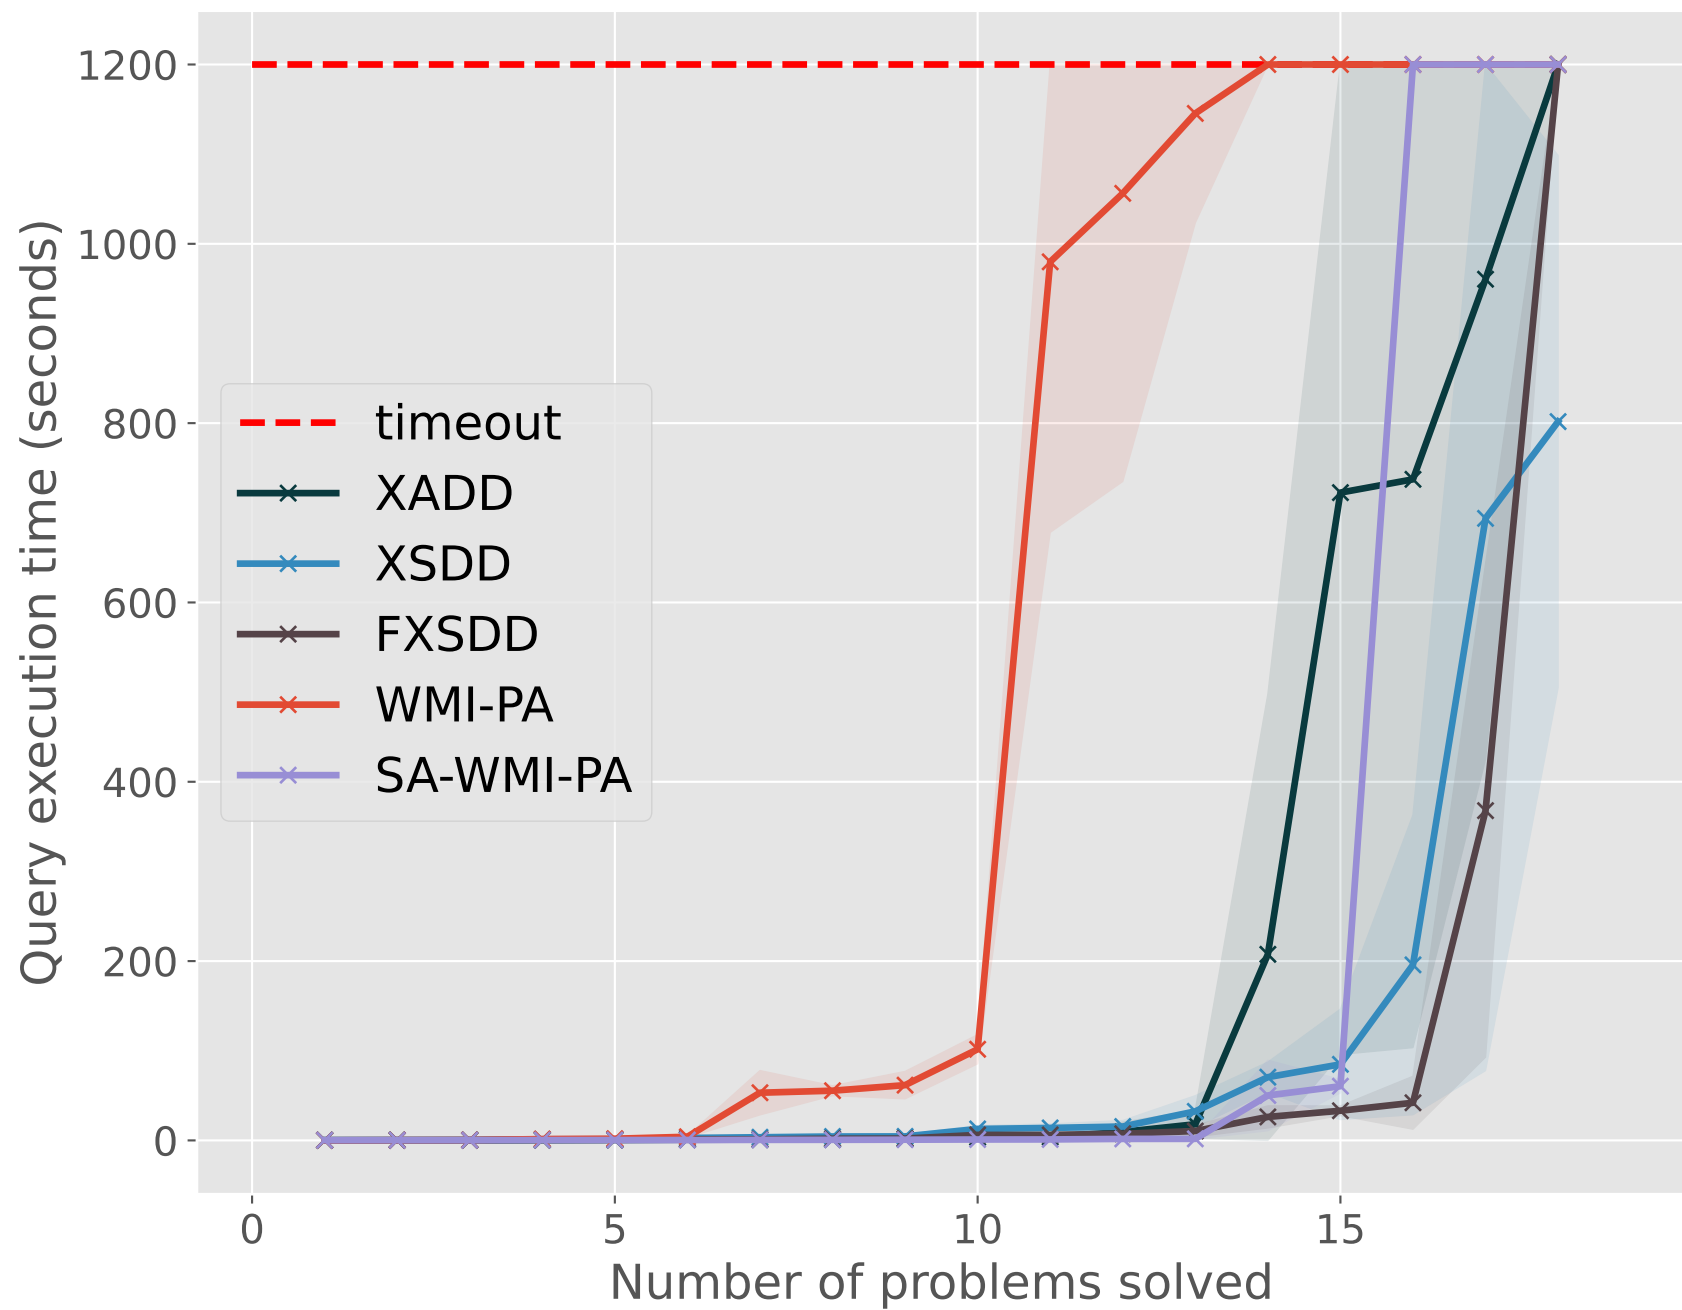

Supplement: supplementary_material [file attachment]

H=0.0

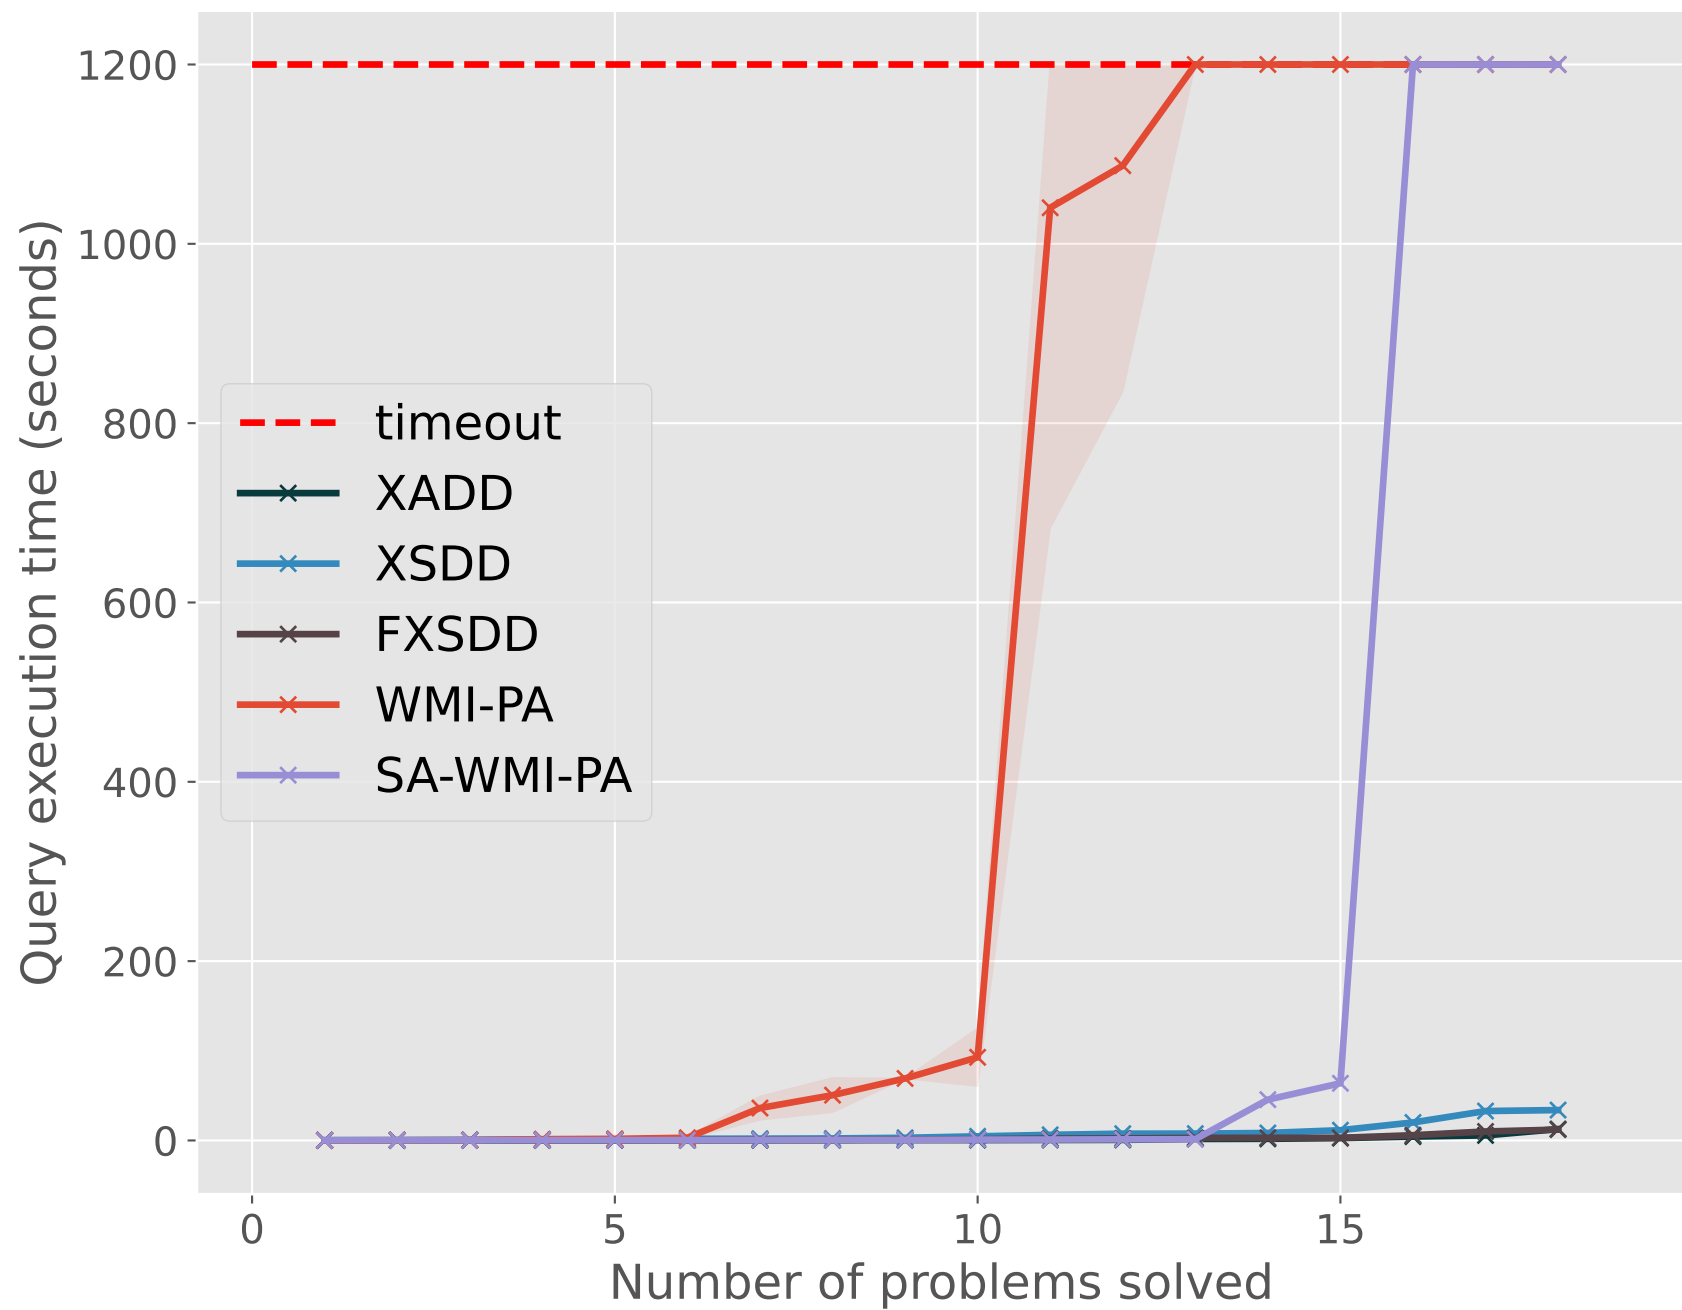

Supplement: supplementary_material [file attachment]

H=0.25

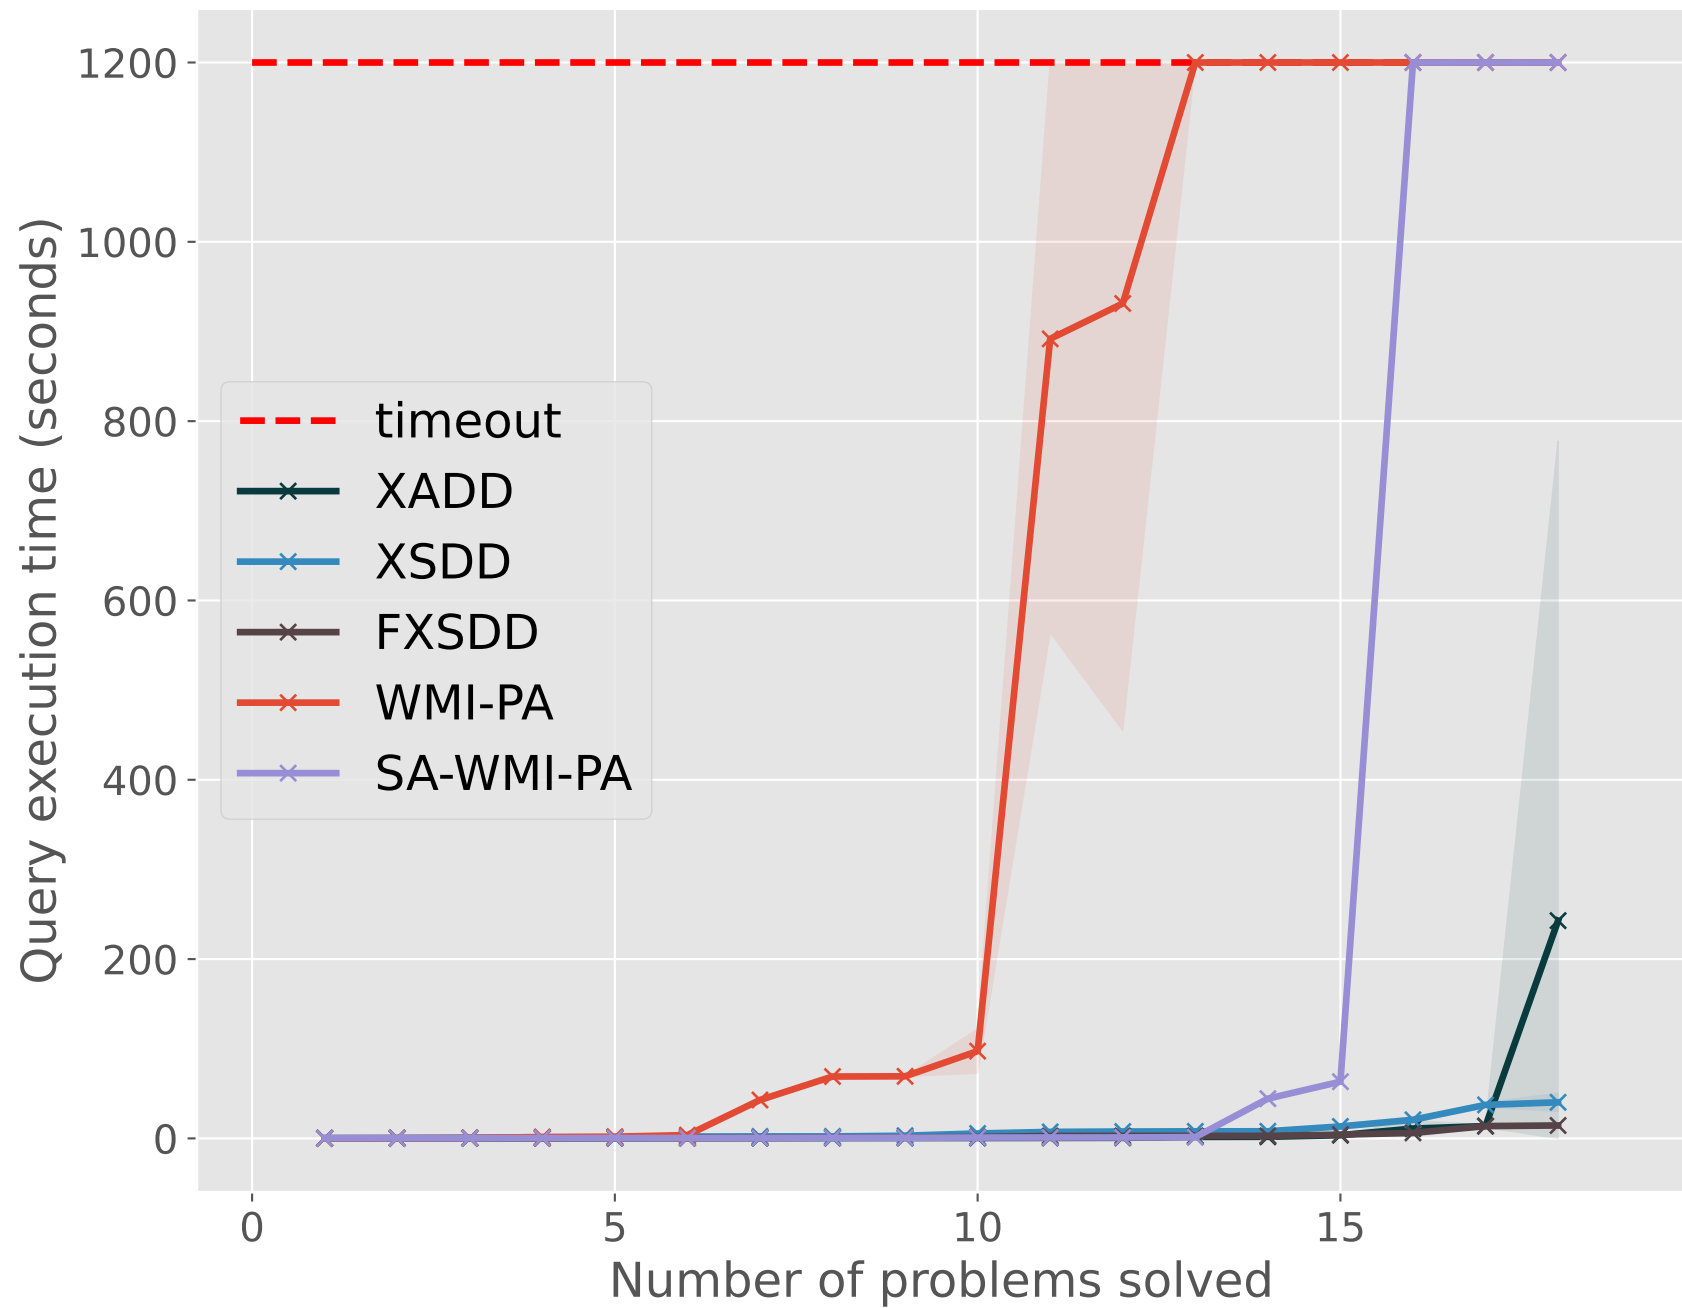

Supplement: supplementary_material [file attachment]

H=1.0

Query execution time (seconds)

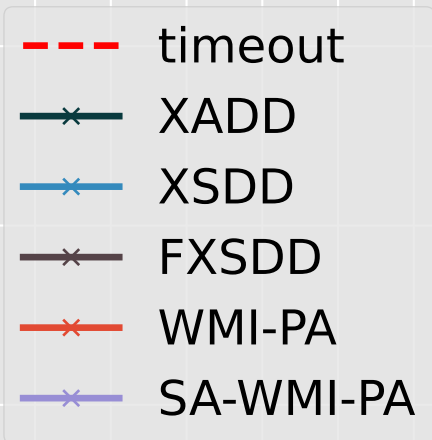

Problem instances

Supplement: supplementary_material [file attachment]

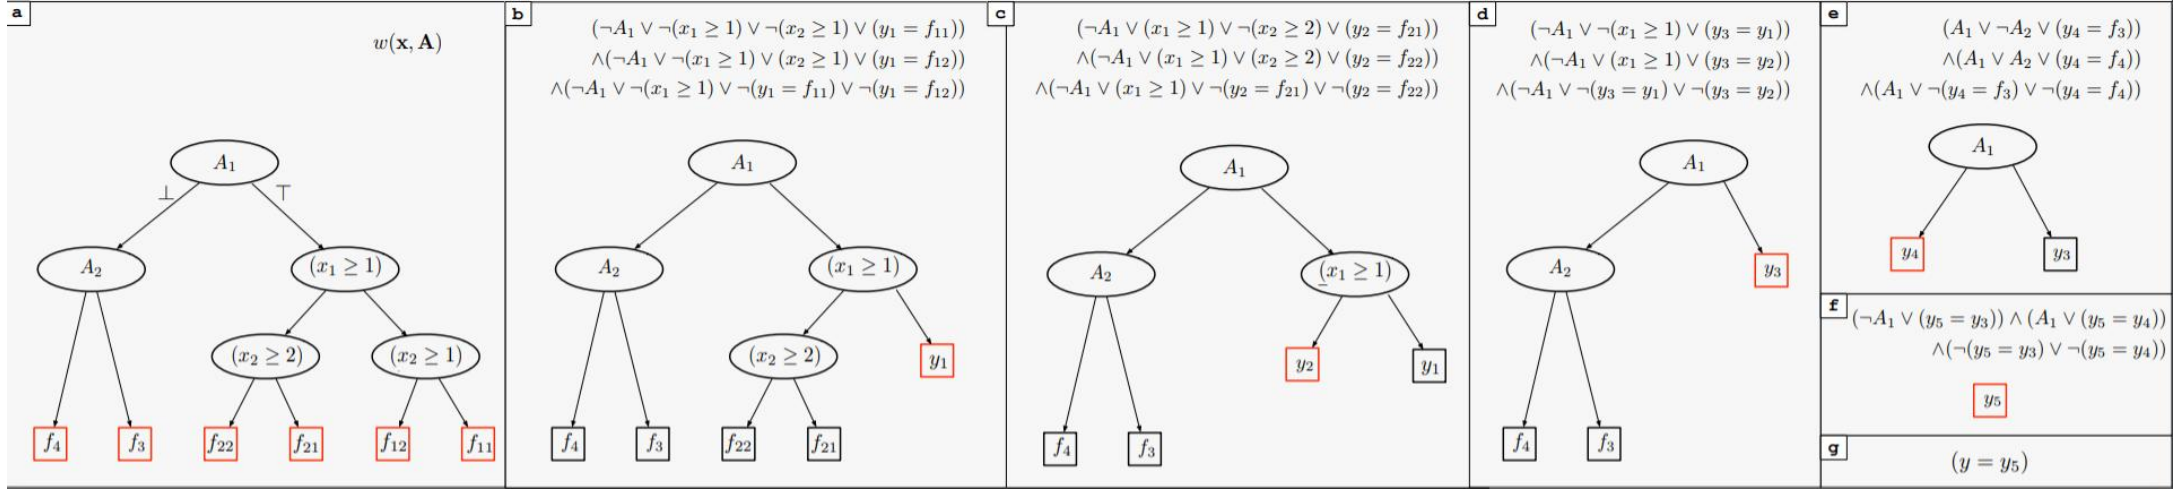

Supplement: supplementary_material [file attachment]

H=0.5

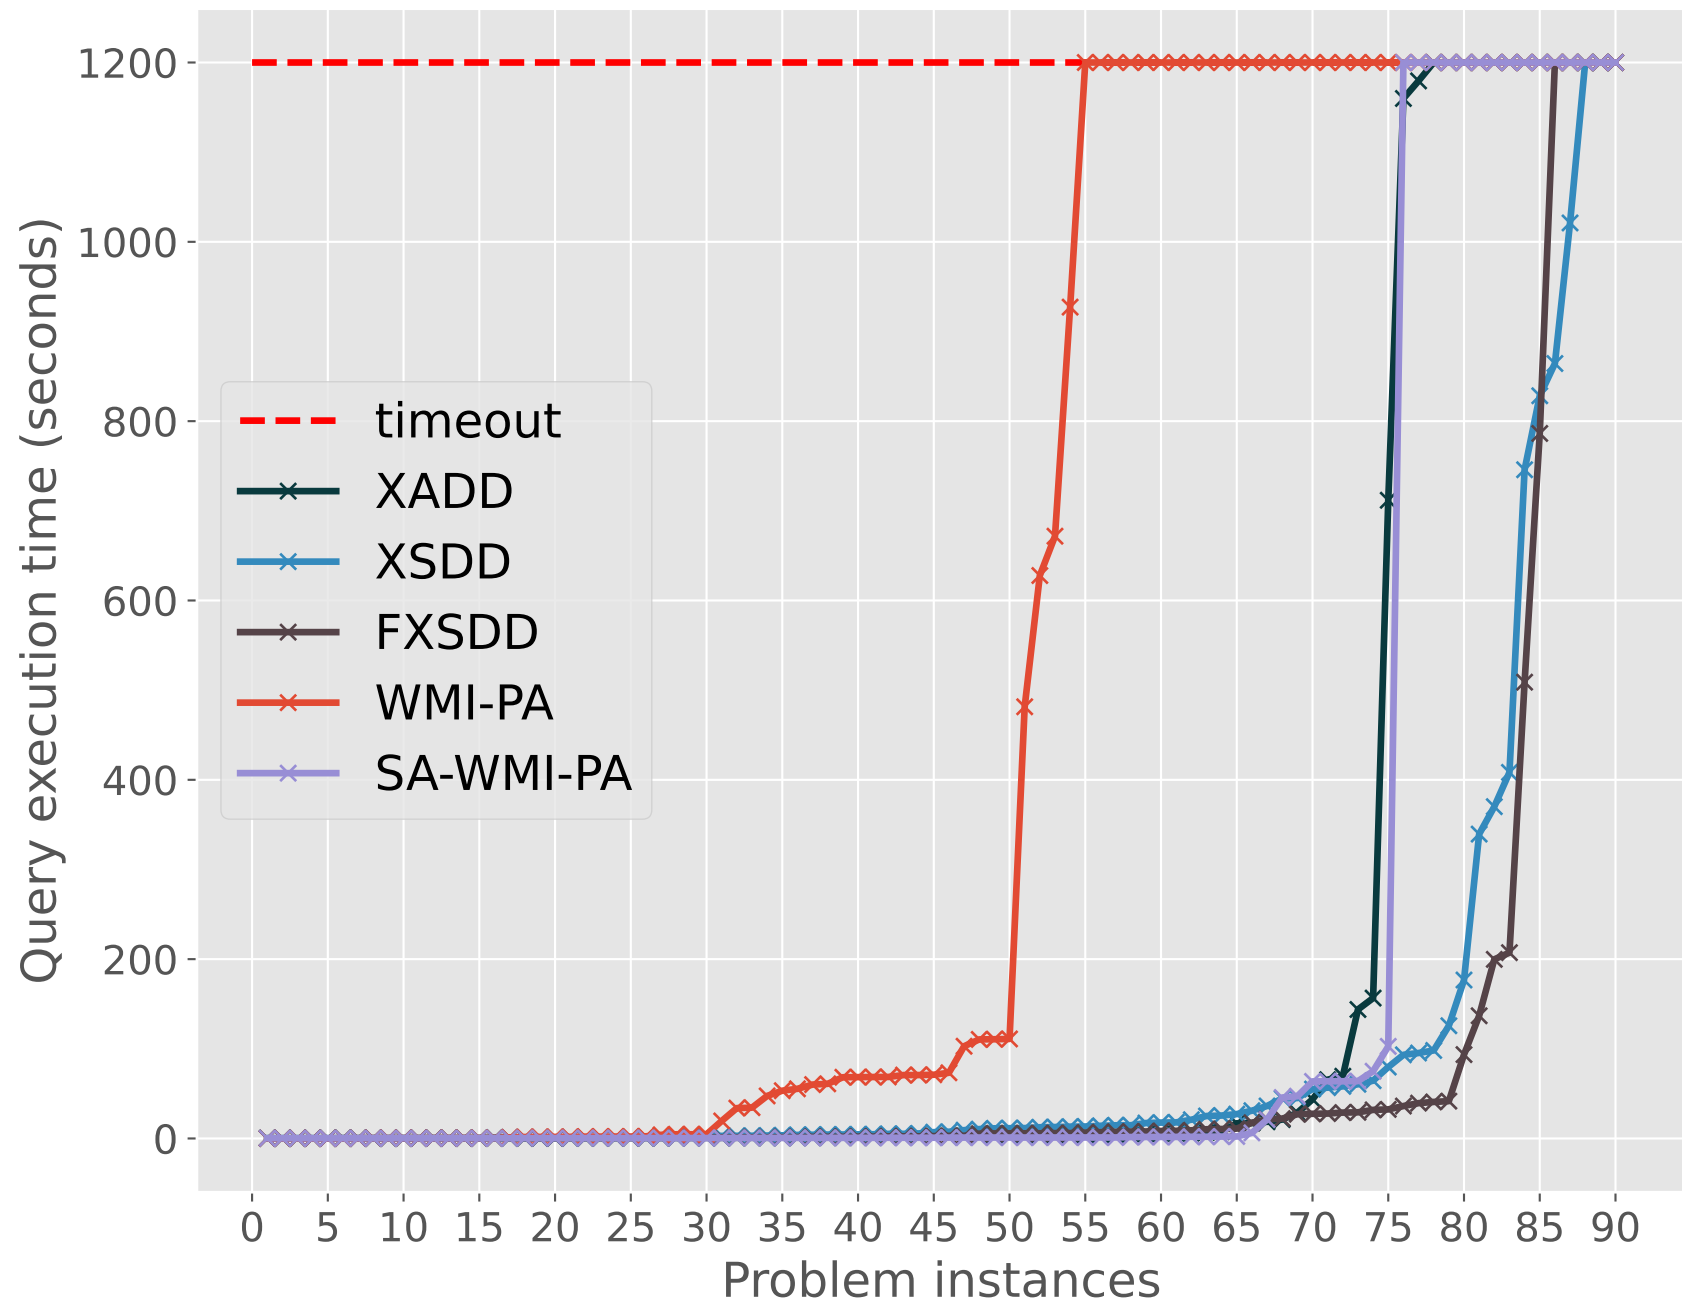

Supplement: supplementary_material [file attachment]
